# Supplementary material for: Combined transient ablation and single-cell RNA-sequencing reveals the development of medullary thymic epithelial cells
Source: eLife journal article supplement (doi:10.7554/elife.60188), 2020-11-23
Supplement: supp [file elife-60188-supp-v1.zip]

Archive with 16 entries (16 files):
- elife_poa_e60188_Figure_1_figure_supplement_1.pdf
- elife_poa_e60188_Figure_2_figure_supplement_1.pdf
- elife_poa_e60188_Figure_2_figure_supplement_2.pdf
- elife_poa_e60188_Figure_3_figure_supplement_1.pdf
- elife_poa_e60188_Figure_3_figure_supplement_2.pdf
- elife_poa_e60188_Figure_3_figure_supplement_3.pdf
- elife_poa_e60188_Figure_4_figure_supplement_1.pdf
- elife_poa_e60188_Figure_4_figure_supplement_2.pdf
- elife_poa_e60188_Figure_4_figure_supplement_3.pdf
- elife_poa_e60188_Figure_5_figure_supplement_1.pdf
- elife_poa_e60188_Figure_5_figure_supplement_2.pdf
- elife_poa_e60188_Figure_6_figure_supplement_1.pdf
- elife_poa_e60188_Figure_6_figure_supplement_2.pdf
- elife_poa_e60188_Figure_6_figure_supplement_3.pdf
- elife_poa_e60188_Supplementary_file_1.xlsx
- elife_poa_e60188_Transparent_Reporting_File.docx
