# Supplementary material for: Combined transient ablation and single-cell RNA-sequencing reveals the development of medullary thymic epithelial cells
Source: eLife journal article supplement (doi:10.7554/elife.60188), 2020-11-23

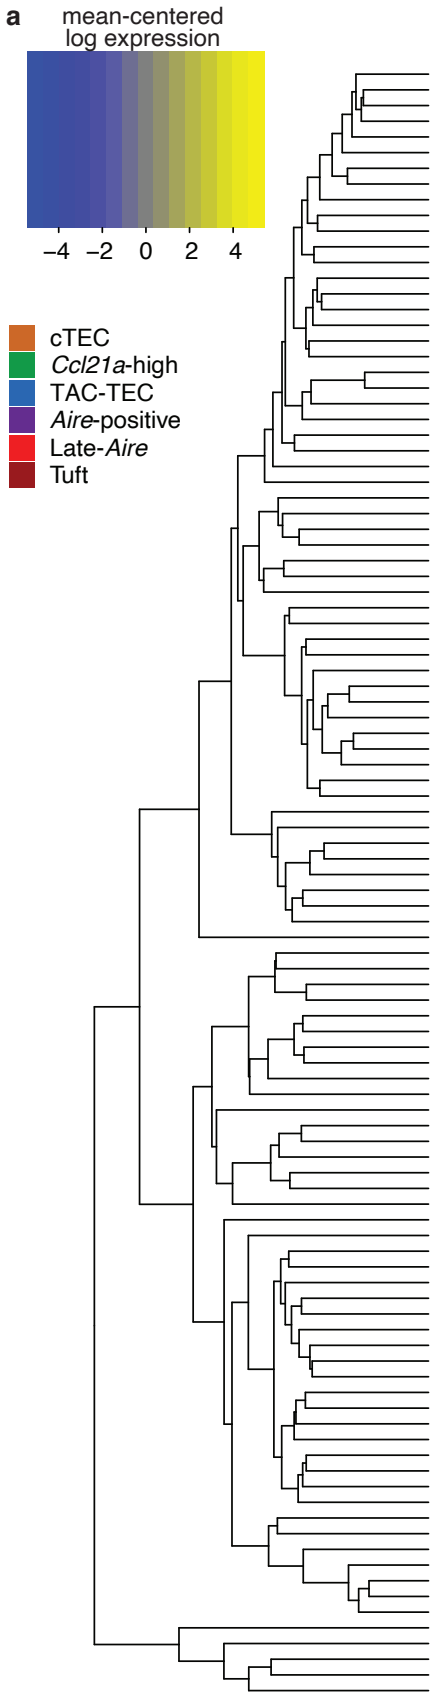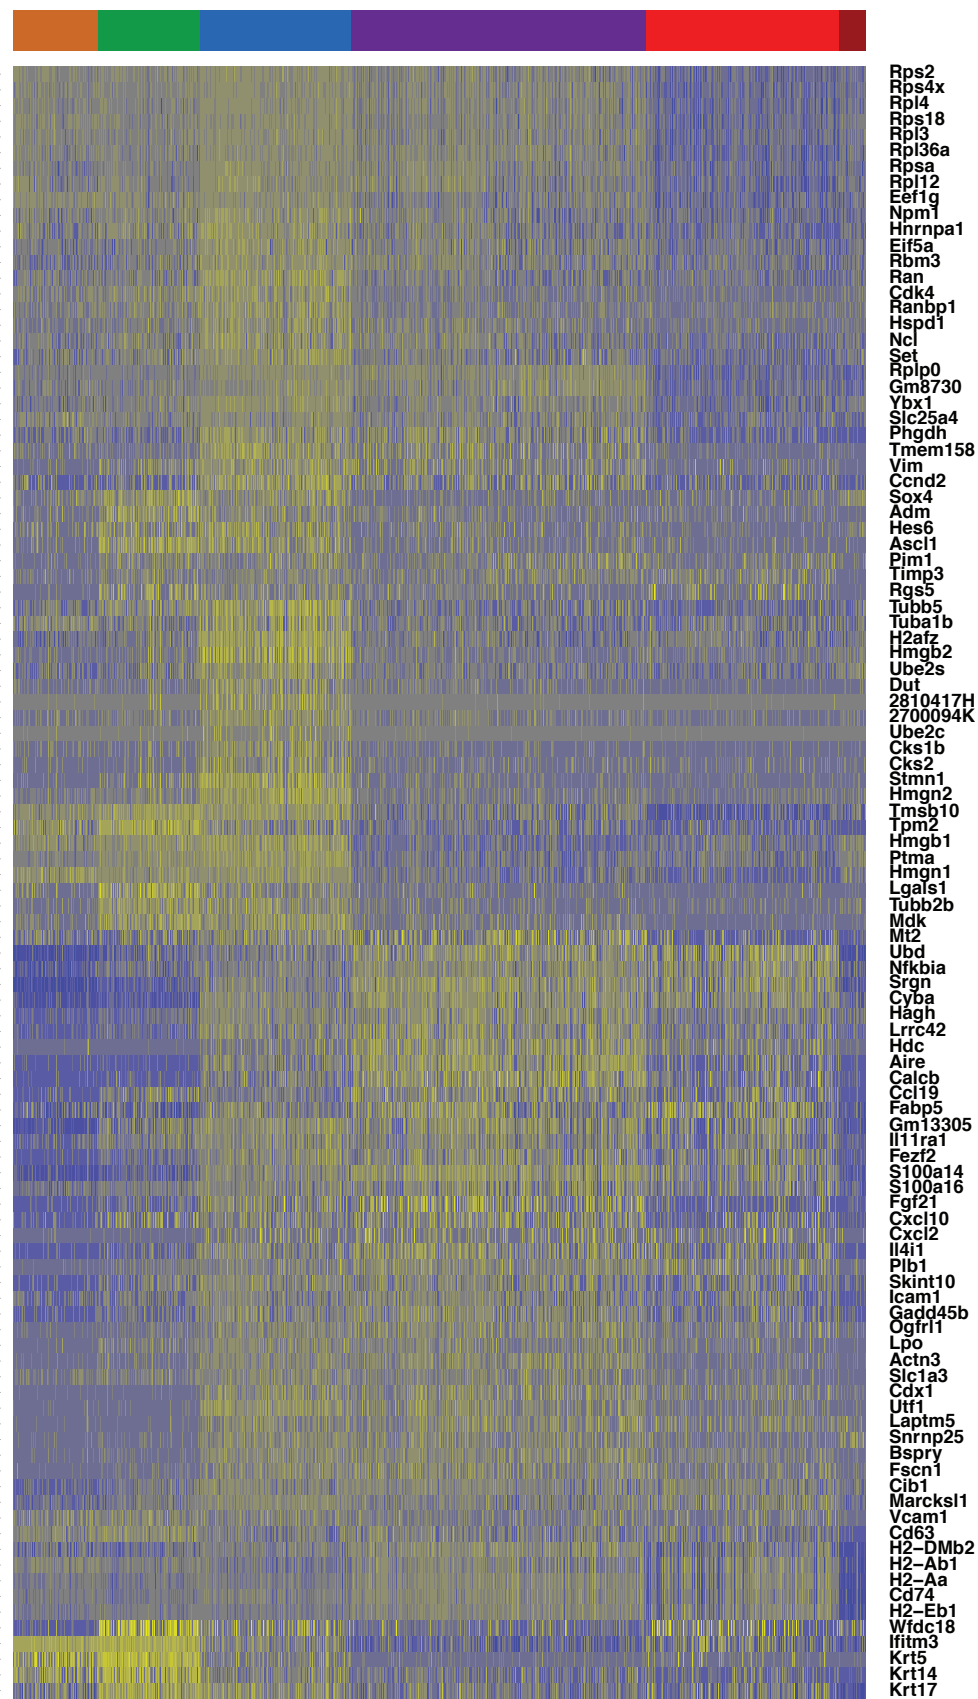

**b**

|                       | Unique genes (count) | TA genes (count) | Expected | Over representation | adjusted p-val |
|-----------------------|----------------------|------------------|----------|---------------------|----------------|
| <i>Aire</i> -positive | 29                   | 0                | 0.24     | 0                   | 1              |
| <i>Ccl21a</i> -high   | 38                   | 4                | 0.32     | 13                  | 0.002          |
| cTEC                  | 52                   | 3                | 0.44     | 6.9                 | 0.069          |
| TAC-TEC               | 35                   | 21               | 0.29     | 72.4                | 1.44E-34       |
| Late- <i>Aire</i>     | 69                   | 0                | 0.058    | 0                   | 1              |
| Tuft                  | 132                  | 5                | 1.12     | 4.46                | 0.038          |

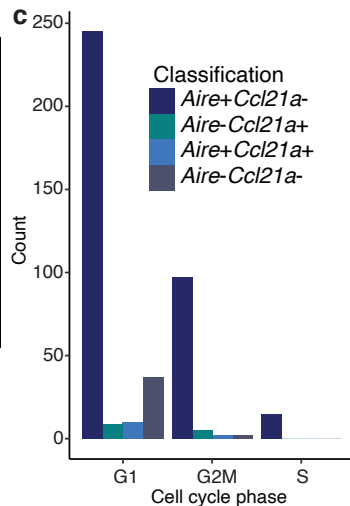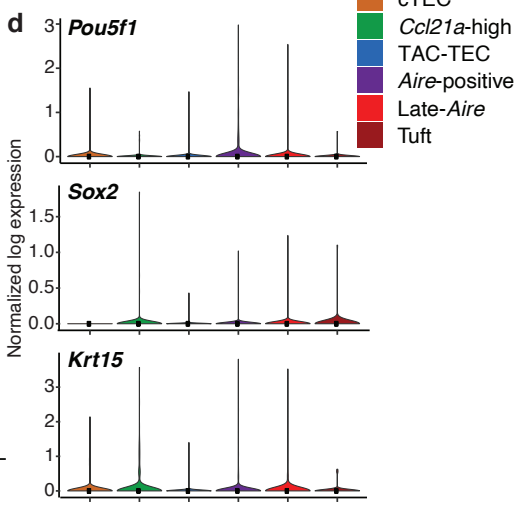

Supplement: supp [file elife-60188-supp-v1.zip › elife_poa_e60188_Figure_2_figure_supplement_1.pdf]
