# Supplementary material for: Combined transient ablation and single-cell RNA-sequencing reveals the development of medullary thymic epithelial cells
Source: eLife journal article supplement (doi:10.7554/elife.60188), 2020-11-23
Supplement: supp [file elife-60188-supp-v1.zip › elife_poa_e60188_Figure_4_figure_supplement_2.pdf]

**a**

cTEC  
*Ccl21a*-high  
TAC-TEC

Late-Aire  
Tuft  
*Aire*-positive

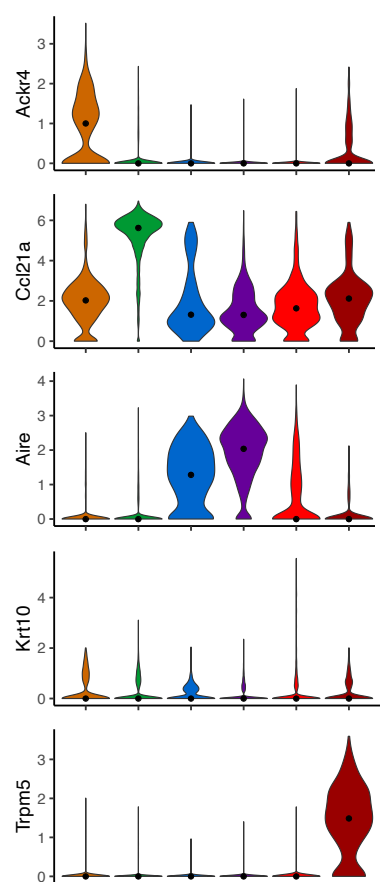

**d**

cTEC  
*Ccl21a*-high  
TAC-TEC

Late-Aire  
Tuft  
*Aire*-positive

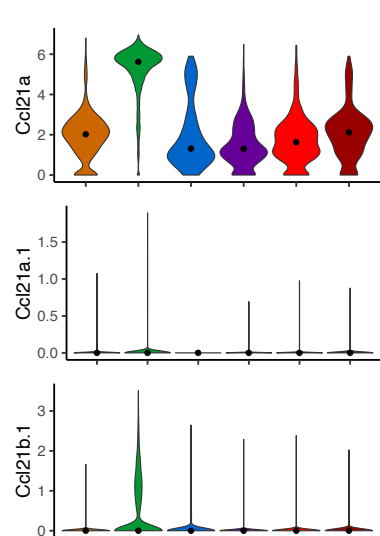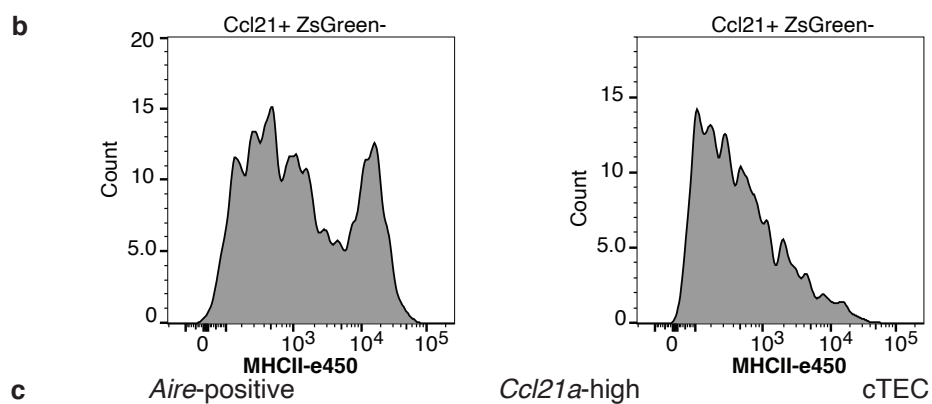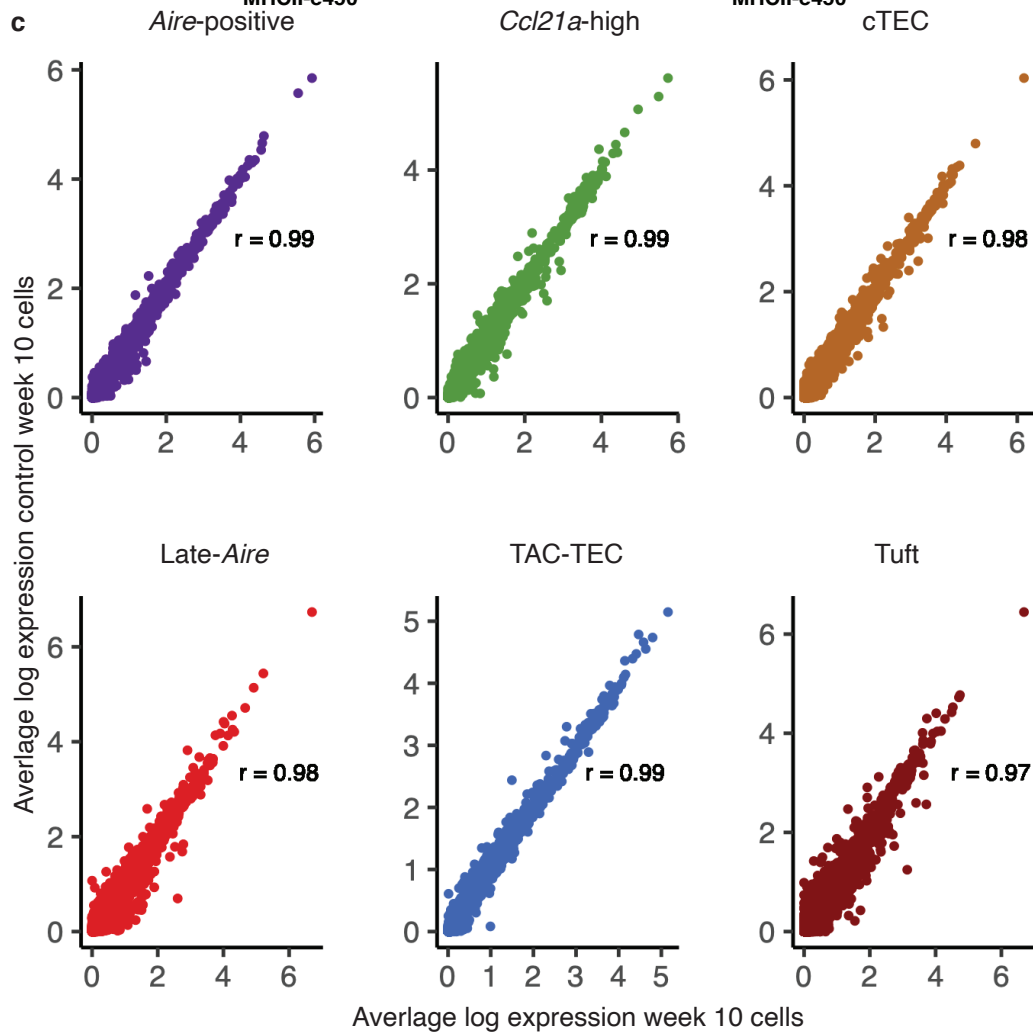

**e** Cell counts for each population per sample

| Sample               | Week 2 control | Week 10 control | Week 2 | Week 4 | Week 6 | Week 10 | Aire Trace | Total |
|----------------------|----------------|-----------------|--------|--------|--------|---------|------------|-------|
| Cortico medullary    | 56             | 70              | 128    | 269    | 157    | 77      | 105        | 862   |
| <i>Ccl21a</i> high   | 173            | 283             | 698    | 1000   | 386    | 273     | 824        | 3679  |
| TAC-TEC              | 114            | 156             | 22     | 18     | 25     | 110     | 71         | 516   |
| <i>Aire</i> Positive | 452            | 499             | 79     | 52     | 102    | 419     | 116        | 1719  |
| Late Aire            | 292            | 212             | 170    | 43     | 26     | 237     | 163        | 1143  |
| Tuft                 | 58             | 39              | 115    | 69     | 27     | 72      | 69         | 449   |
| T cell               | 18             | 12              | 10     | 24     | 7      | 17      | 39         | 127   |
| Total                | 1163           | 1271            | 1222   | 1475   | 730    | 1205    | 1387       | 8453  |
