# Supplementary material for: Combined transient ablation and single-cell RNA-sequencing reveals the development of medullary thymic epithelial cells
Source: eLife journal article supplement (doi:10.7554/elife.60188), 2020-11-23

## TAC-TEC

| ident 1  | ident 2   | Ccl21a |           | Aire  |           | Fezf2 |           | Stmn1 |           | Tubb5 |           | Hmgb2 |           |
|----------|-----------|--------|-----------|-------|-----------|-------|-----------|-------|-----------|-------|-----------|-------|-----------|
|          |           | logFC  | adj-p-val | logFC | adj-p-val | logFC | adj-p-val | logFC | adj-p-val | logFC | adj-p-val | logFC | adj-p-val |
| wk 2     | ctl wk 10 | 1.82   | 1.51E-05  | -0.92 | 0.04      | -0.34 | 1         | 0.27  | 1         | -0.50 | 1         | -0.14 | 1         |
| wk 4     | ctl wk 10 | 2.20   | 1.26E-05  | -1.61 | 4.96E-05  | -0.63 | 1         | 0.4   | 1         | -0.07 | 1         | 0.07  | 1         |
| wk 6     | ctl wk 10 | 1.47   | 1.29E-06  | -0.50 | 1         | -0.67 | 0.26      | -0.21 | 1         | 0.19  | 1         | -0.21 | 1         |
| wk 10    | ctl wk 10 | -0.54  | 1         | 0.26  | 1         | -0.13 | 1         | -0.11 | 1         | -0.13 | 1         | 0.04  | 1         |
| ctl wk 2 | ctl wk 10 | -0.14  | 1         | 0.01  | 1         | -0.24 | 1         | -0.03 | 1         | -0.32 | 0.06      | -0.06 | 1         |

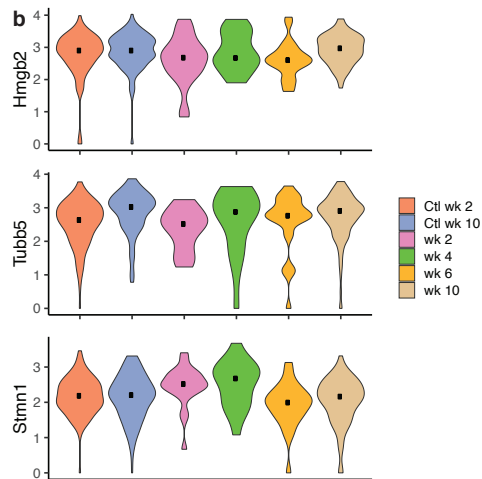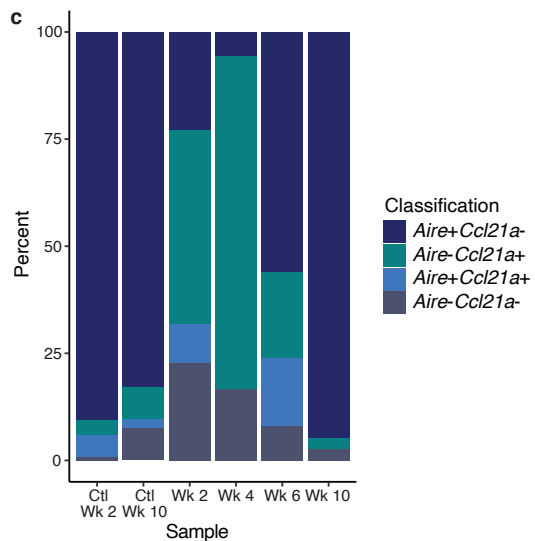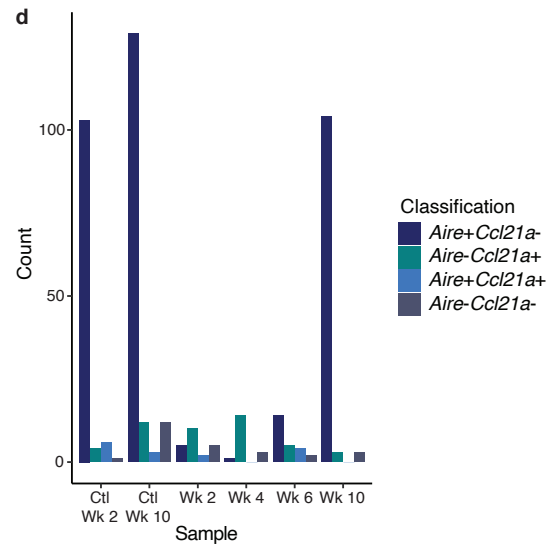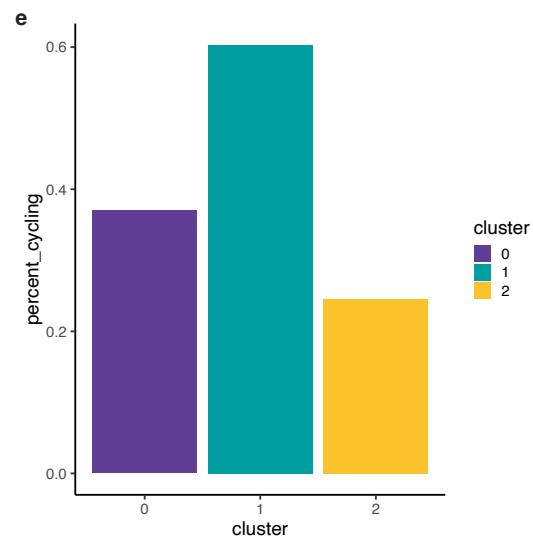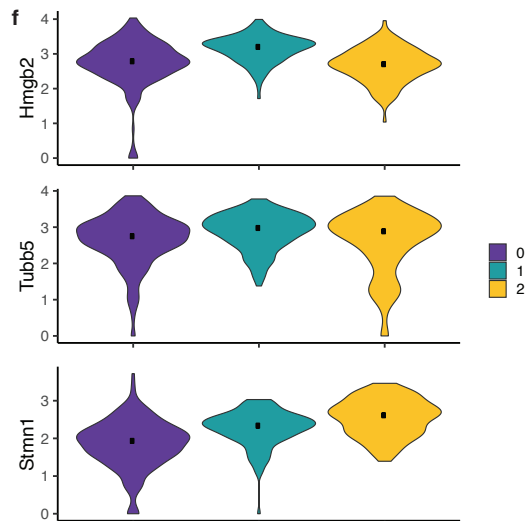

Supplement: supp [file elife-60188-supp-v1.zip › elife_poa_e60188_Figure_5_figure_supplement_1.pdf]
