# Supplementary material for: Combined transient ablation and single-cell RNA-sequencing reveals the development of medullary thymic epithelial cells
Source: eLife journal article supplement (doi:10.7554/elife.60188), 2020-11-23

a

Aire-Positive

| ident 1  | ident 2   | Aire  |           | Fezf2 |           | Gapdh |           |
|----------|-----------|-------|-----------|-------|-----------|-------|-----------|
|          |           | logFC | adj-p-val | logFC | adj-p-val | logFC | adj-p-val |
| wk 2     | ctl wk 10 | -0.32 | 1         | 0.05  | 1         | -0.01 | 1         |
| wk 4     | ctl wk 10 | -0.90 | 1.17E+08  | -0.01 | 1         | -0.17 | 1         |
| wk 6     | ctl wk 10 | -0.22 | 1         | -0.24 | 1         | -0.23 | 1         |
| wk 10    | ctl wk 10 | -0.01 | 1         | -0.11 | 1         | -0.06 | 1         |
| ctl wk 2 | ctl wk 10 | -0.06 | 1         | -0.21 | 1         | 0.21  | 1.57E-07  |

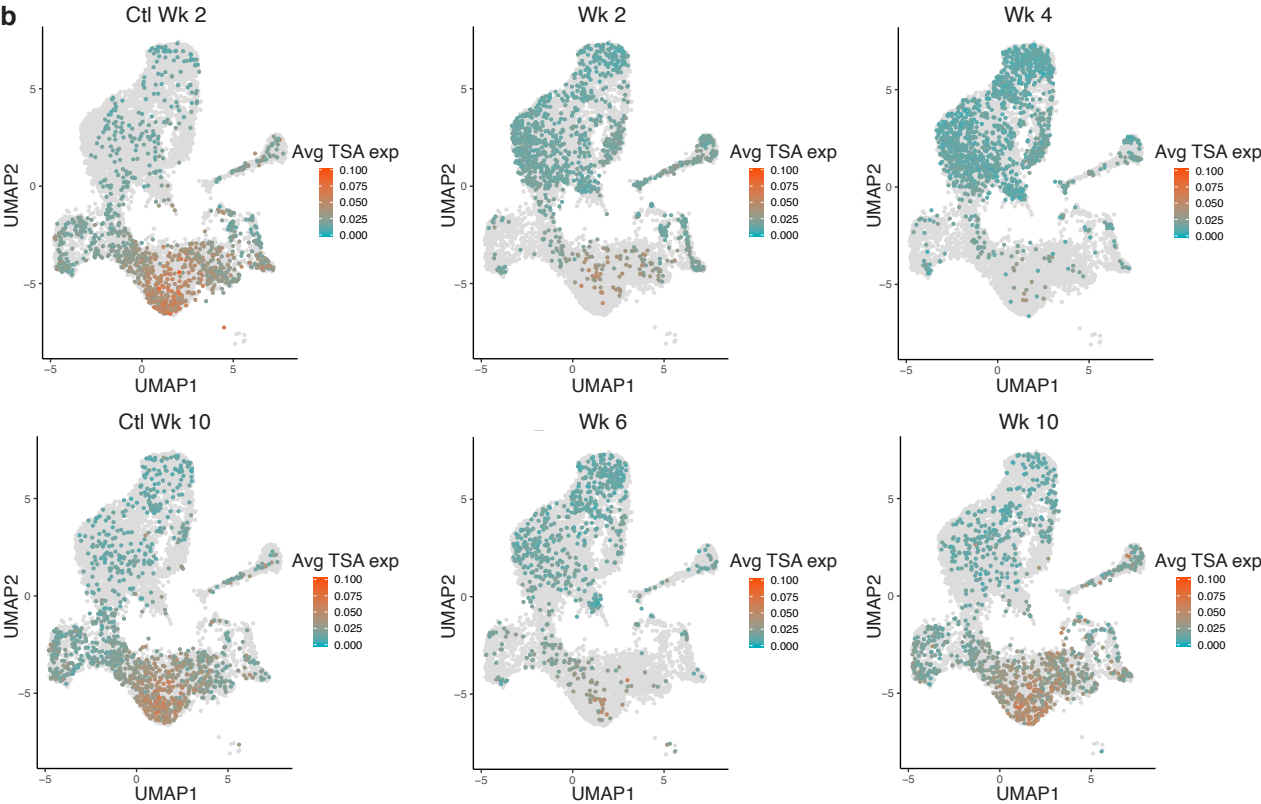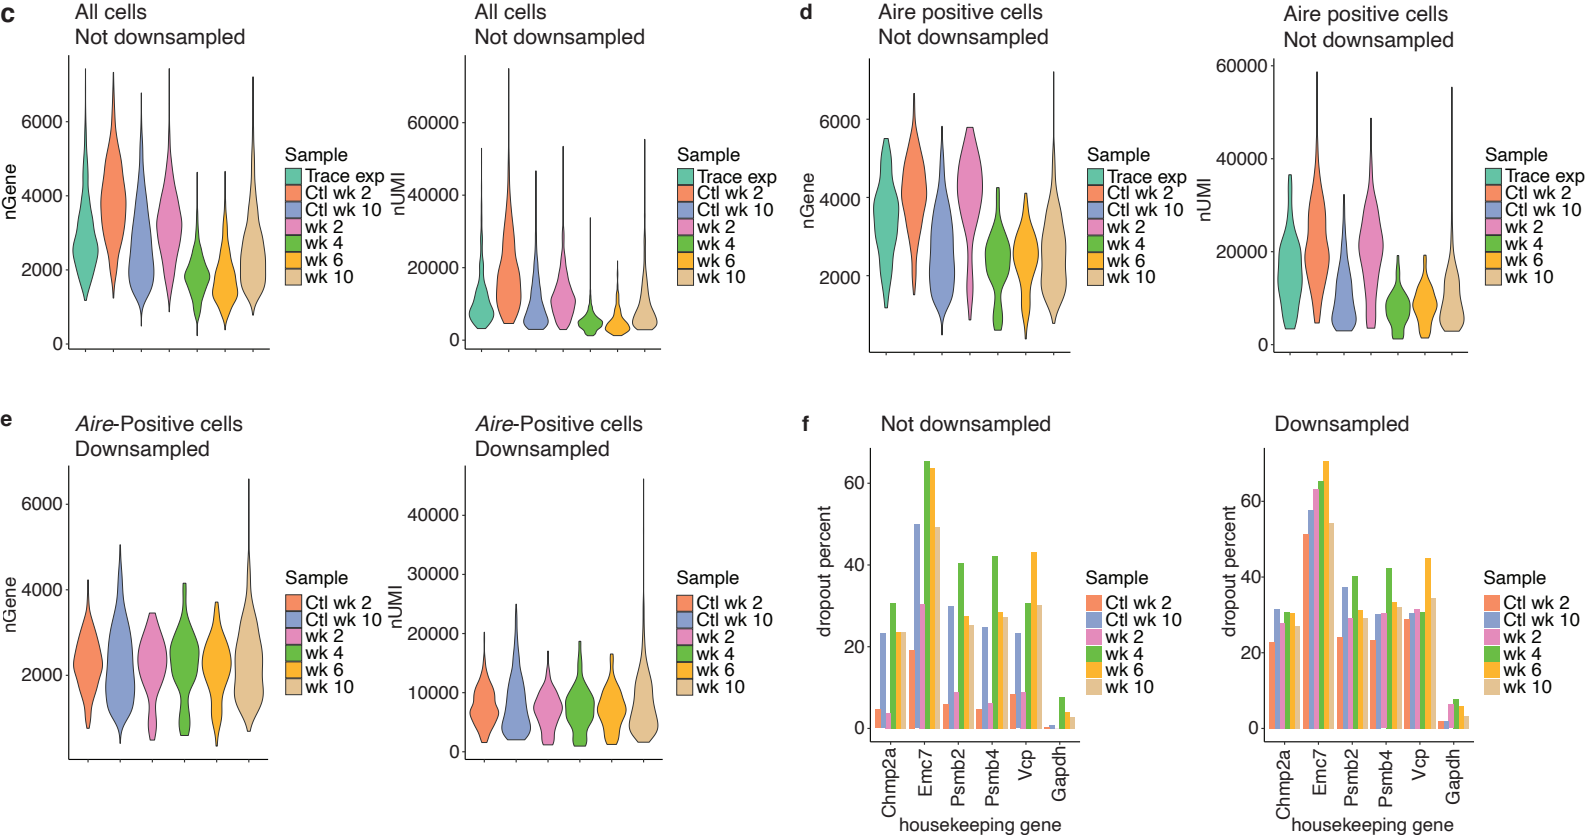

Supplement: supp [file elife-60188-supp-v1.zip › elife_poa_e60188_Figure_6_figure_supplement_2.pdf]
