# Supplementary material for: Combined transient ablation and single-cell RNA-sequencing reveals the development of medullary thymic epithelial cells
Source: eLife journal article supplement (doi:10.7554/elife.60188), 2020-11-23
Supplement: supp [file elife-60188-supp-v1.zip › elife_poa_e60188_Supplementary_file_1.xlsx]

## Sheet: Supplemental table 1
	cTEC	Ccl21a_high	TAC_TEC	Aire_positive	Late_Aire	Tuft
Aire+_zsgreen+	2.8777	2.133	52.6316	92.2222	46.3576	10.1266
Aire-_zsgreen+	35.9712	32.3714	10.5263	0	43.0464	67.0886
Aire+_zsgreen-	2.8777	4.39147	17.8947	7.77778	1.3245	0
Aire-_zsgreen-	58.2734	61.1041	18.9474	0	9.27152	22.7848
Ackr4+_zsgreen+	26.6187	3.13676	3.15789	4.44444	1.3245	32.9114
Ackr4-_zsgreen+	12.2302	31.3676	60	87.7778	88.0795	44.3038
Ackr4+_zsgreen-	41.0072	3.51317	0	0	0	6.32911
Ackr4-_zsgreen-	20.1439	61.9824	36.8421	7.77778	10.596	16.4557
Trpm5+_zsgreen+	0	0.250941	2.10526	2.22222	5.29801	73.4177
Trpm5-_zsgreen+	38.8489	34.2535	61.0526	90	84.106	3.79747
Trpm5+_zsgreen-	0.719424	0.752823	2.10526	0	0	22.7848
Trpm5-_zsgreen-	60.4317	64.7428	34.7368	7.77778	10.596	0
Fezf2+_zsgreen+	8.63309	19.4479	63.1579	83.3333	71.5232	18.9873
Fezf2-_zsgreen+	30.2158	15.0565	0	8.88889	17.8808	58.2278
Fezf2+_zsgreen-	6.47482	33.2497	29.4737	5.55556	5.96026	2.53165
Fezf2-_zsgreen-	54.6763	32.2459	7.36842	2.22222	4.63576	20.2532
Krt10+_zsgreen+	7.91367	3.63864	0	1.11111	12.5828	8.86076
Krt10-_zsgreen+	30.9353	30.8657	63.1579	91.1111	76.8212	68.3544
Krt10+_zsgreen-	7.91367	6.52447	1.05263	0	1.3245	2.53165
Krt10-_zsgreen-	53.2374	58.9711	35.7895	7.77778	9.27152	20.2532
Ccl21a+_zsgreen+	12.2302	34.2535	14.7368	7.77778	5.29801	21.519
Ccl21a-_zsgreen+	26.6187	0.250941	48.4211	84.4444	84.106	55.6962
Ccl21a+_zsgreen-	15.1079	64.3664	16.8421	0	0.662252	2.53165
Ccl21a-_zsgreen-	46.0432	1.12923	20	7.77778	9.93377	20.2532
