# Supplementary figures and images for: Combined transient ablation and single-cell RNA-sequencing reveals the development of medullary thymic epithelial cells
Source: eLife journal article supplement (doi:10.7554/elife.60188), 2020-11-23

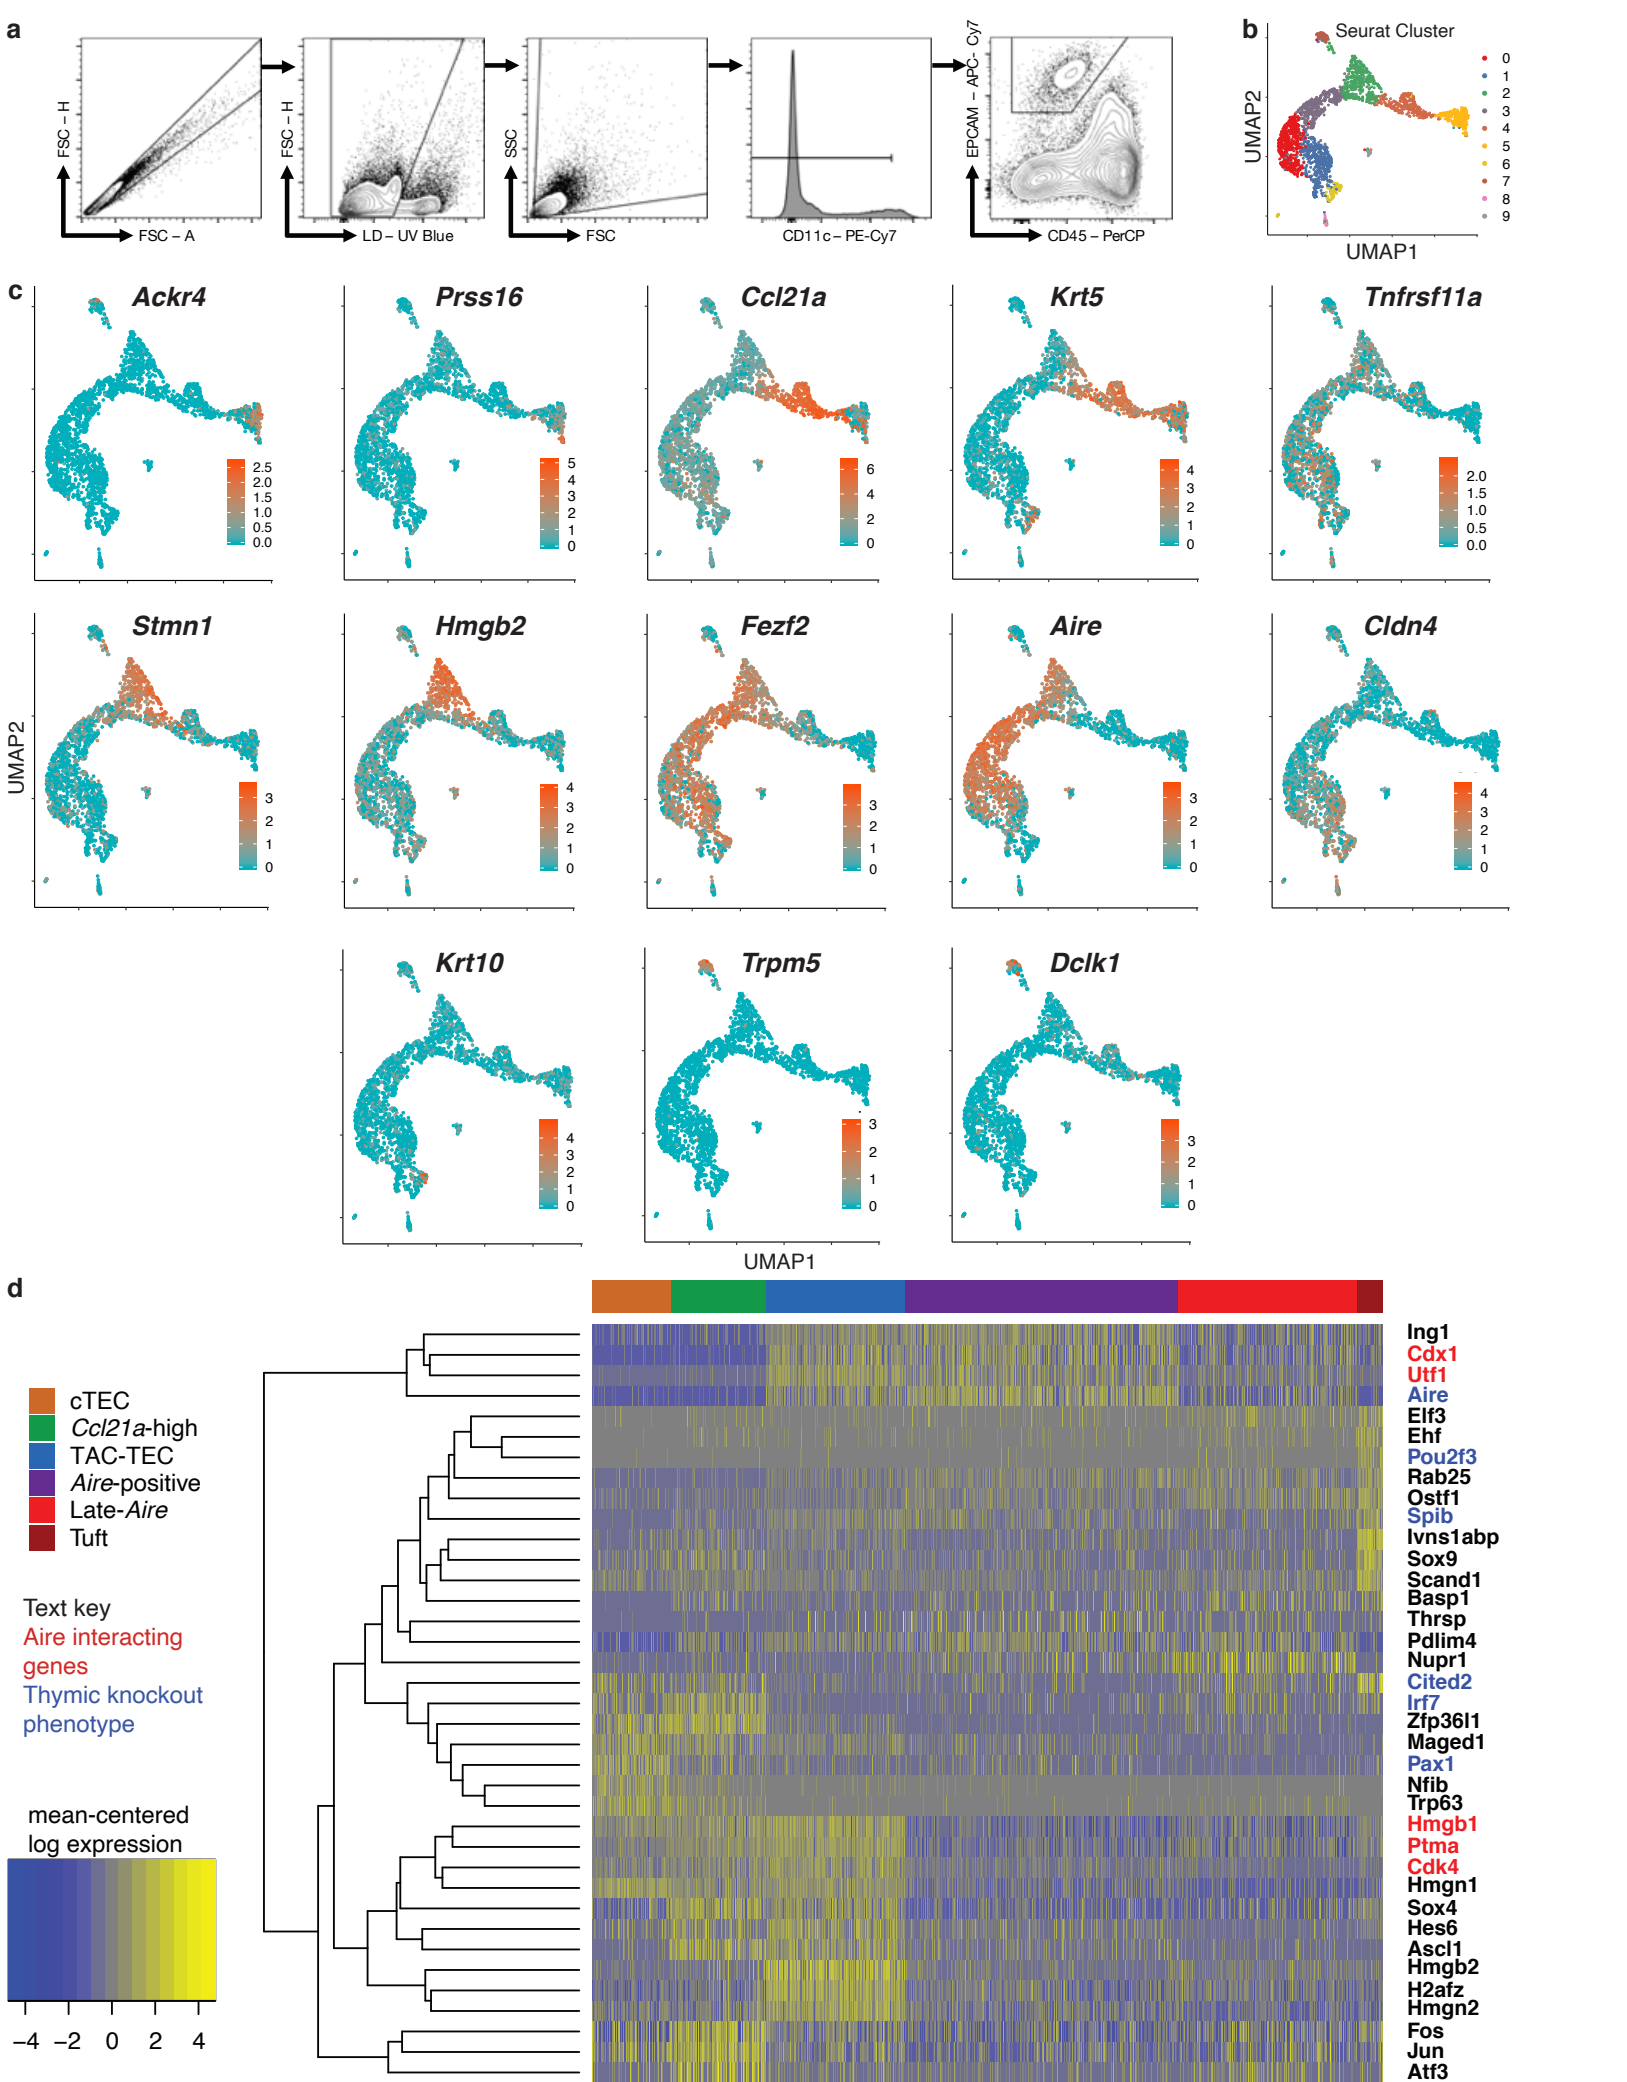

Supplement: supp [file elife-60188-supp-v1.zip › elife_poa_e60188_Figure_1_figure_supplement_1.pdf]

**a**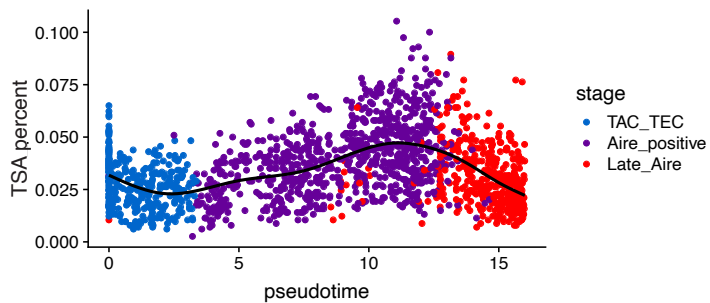**b**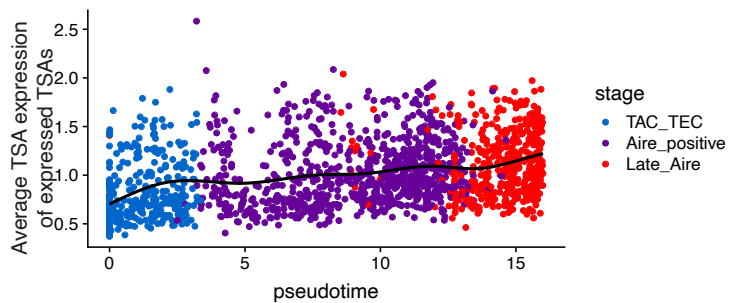**c**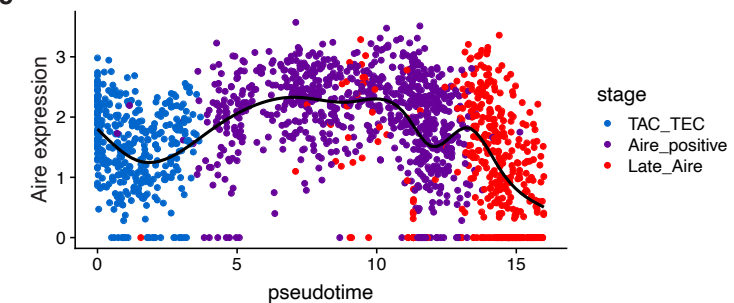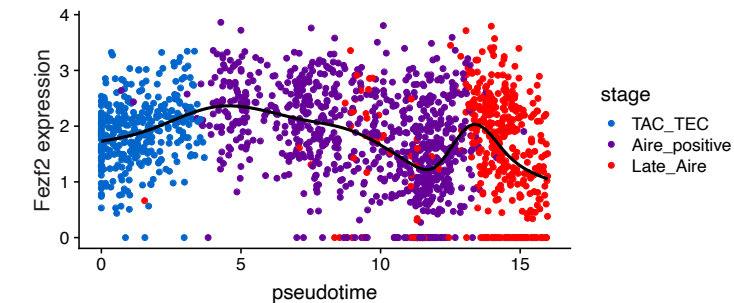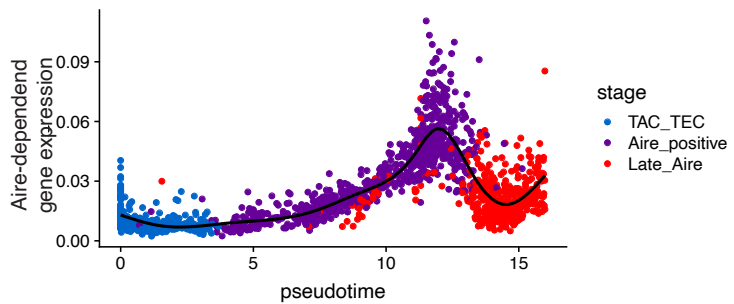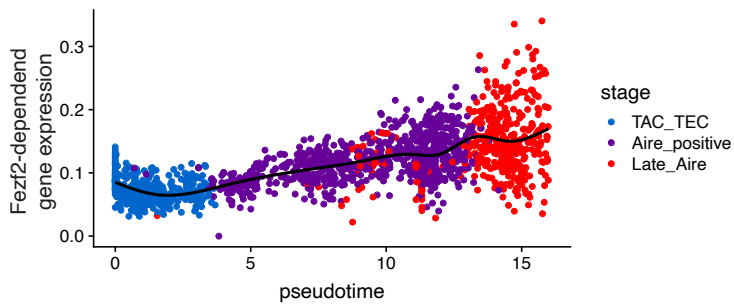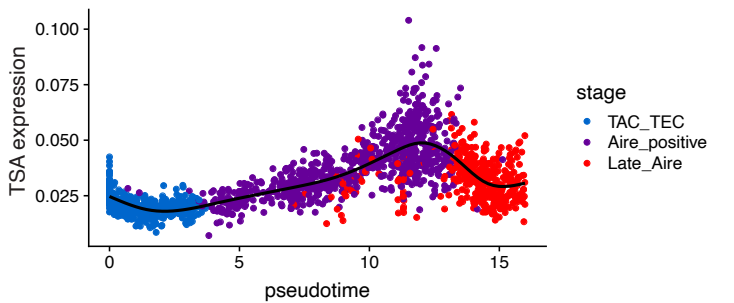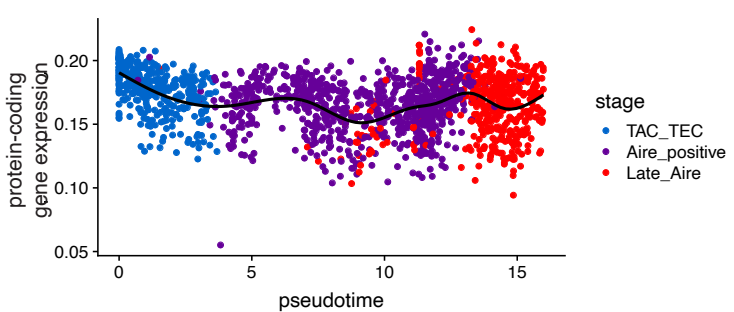

Supplement: supp [file elife-60188-supp-v1.zip › elife_poa_e60188_Figure_2_figure_supplement_2.pdf]

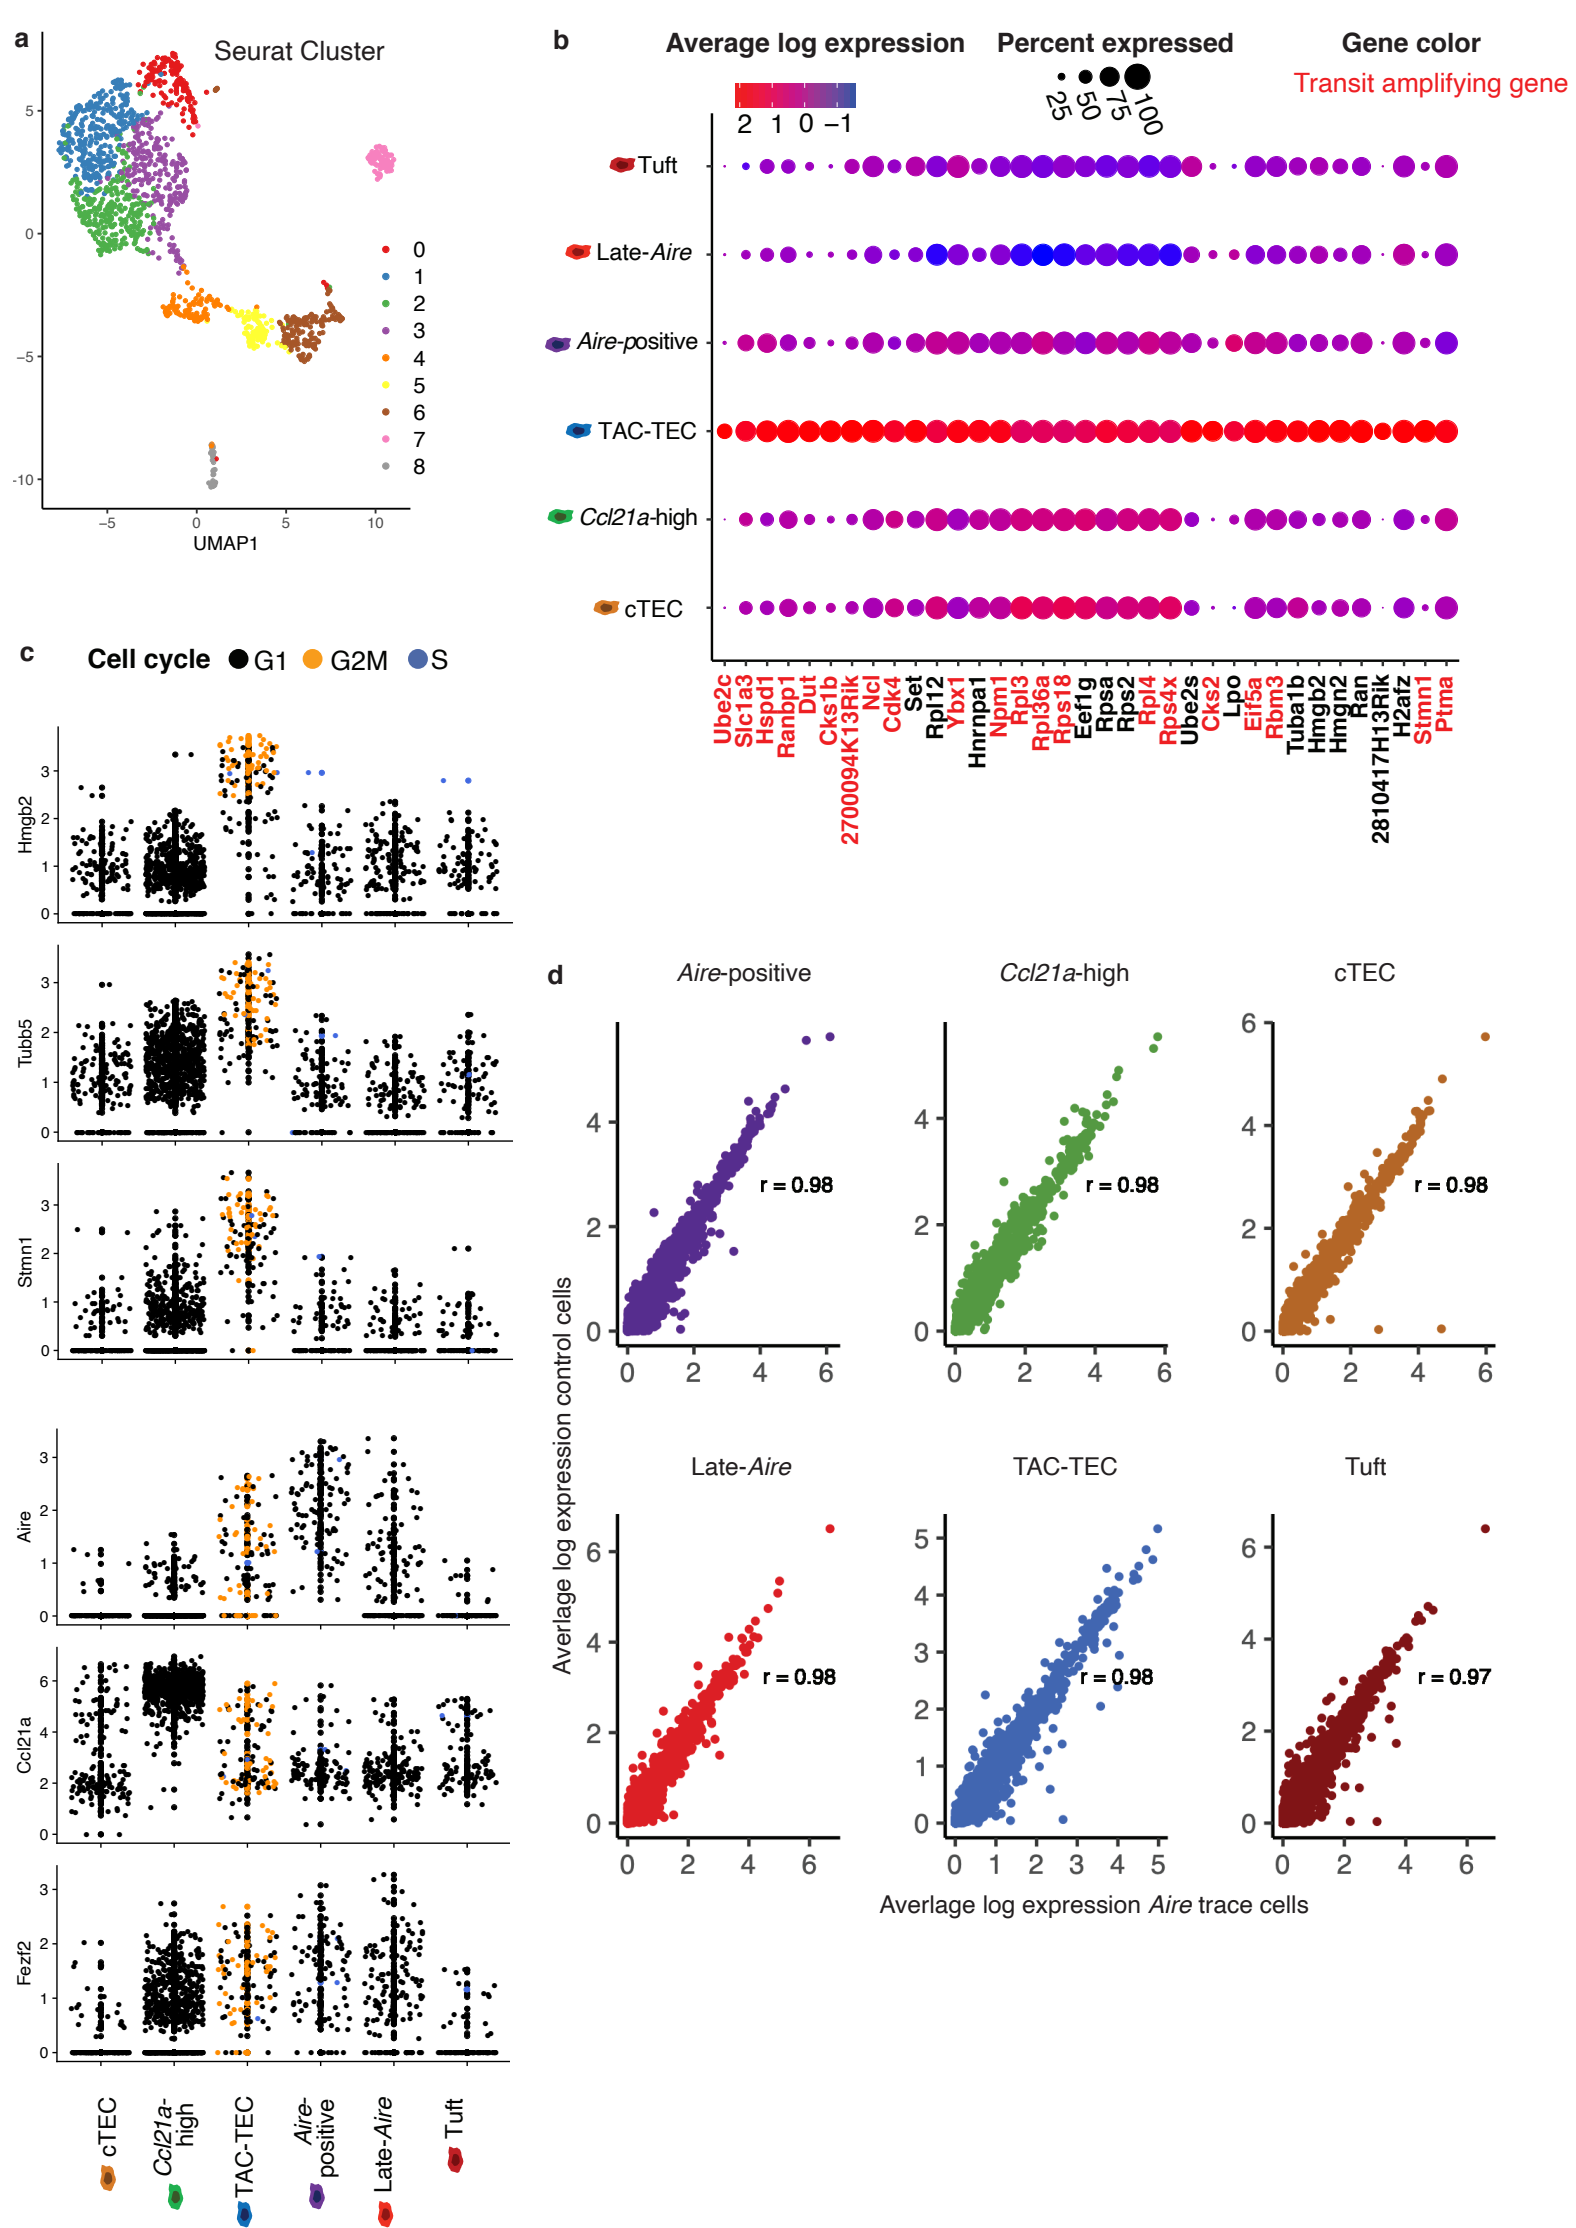

Supplement: supp [file elife-60188-supp-v1.zip › elife_poa_e60188_Figure_3_figure_supplement_1.pdf]

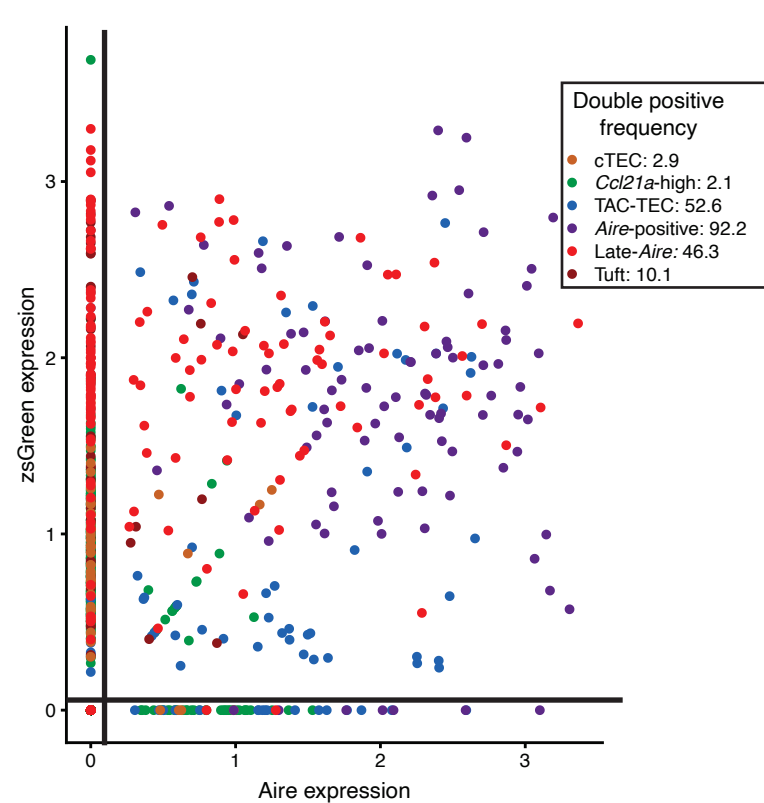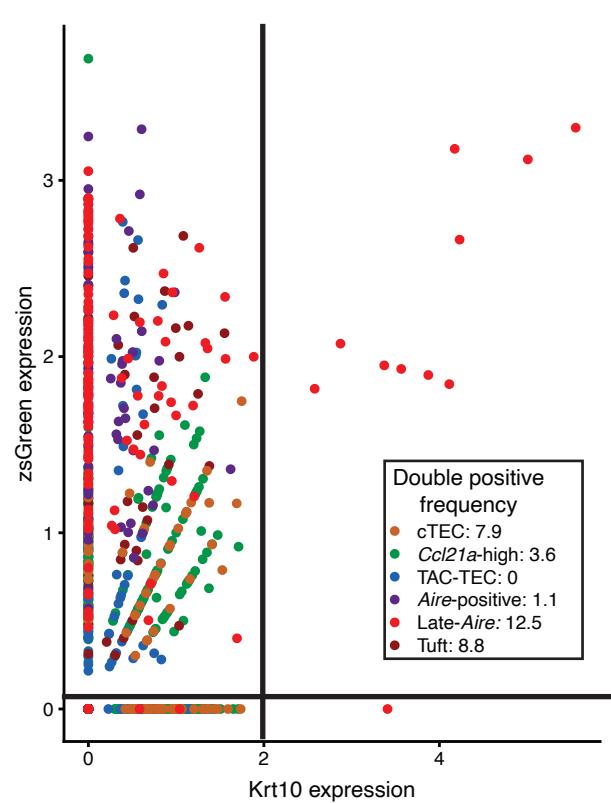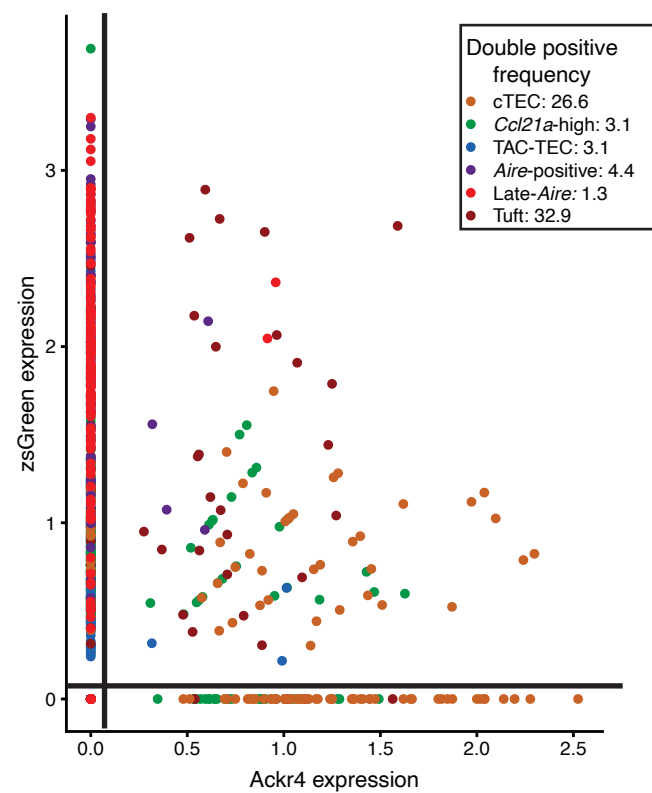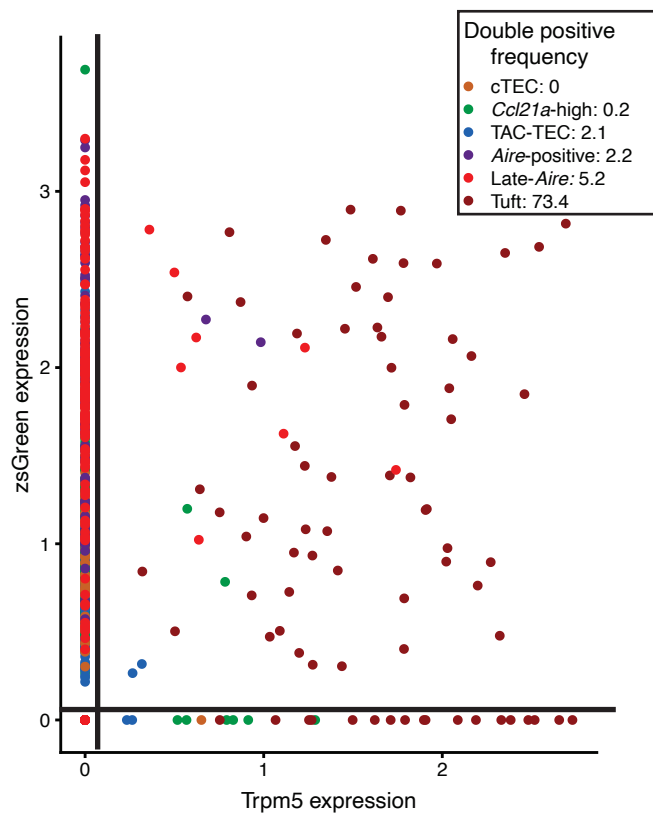

Supplement: supp [file elife-60188-supp-v1.zip › elife_poa_e60188_Figure_3_figure_supplement_2.pdf]

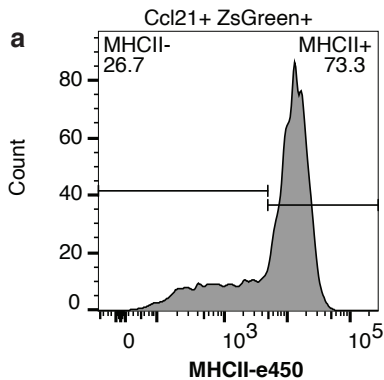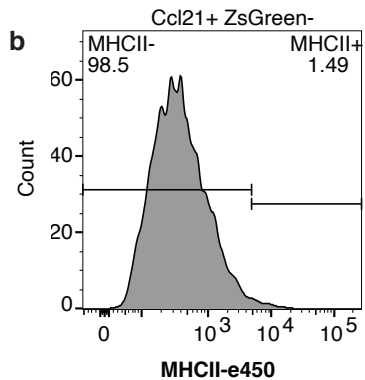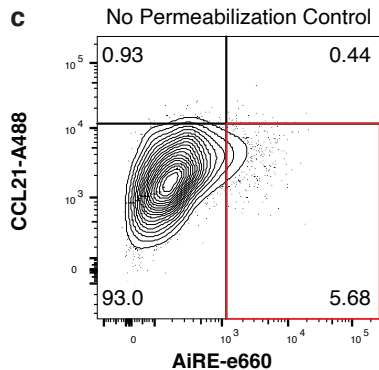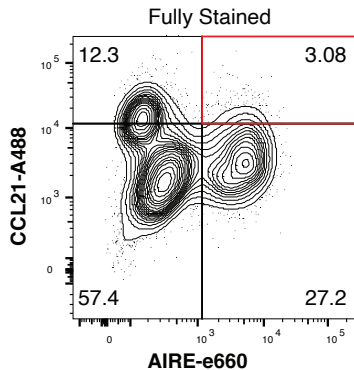

Supplement: supp [file elife-60188-supp-v1.zip › elife_poa_e60188_Figure_3_figure_supplement_3.pdf]

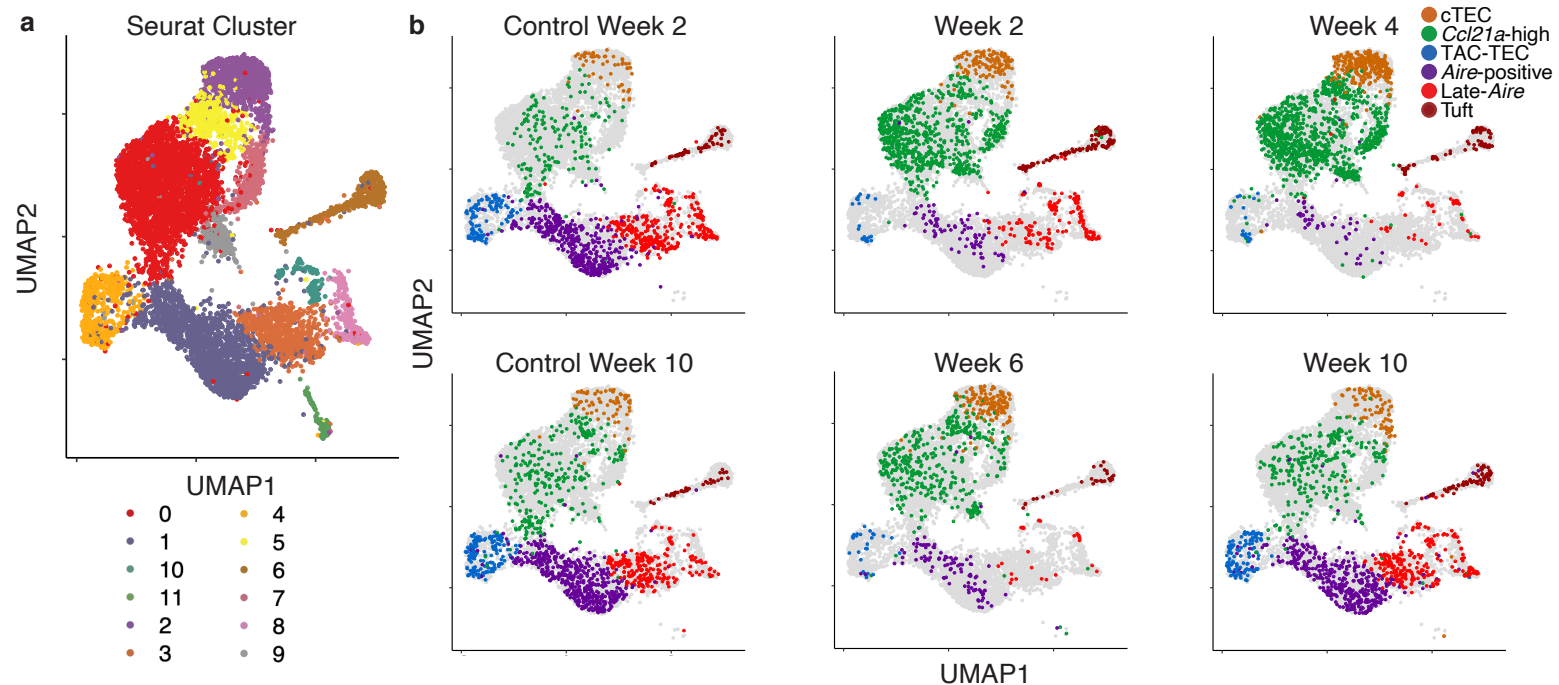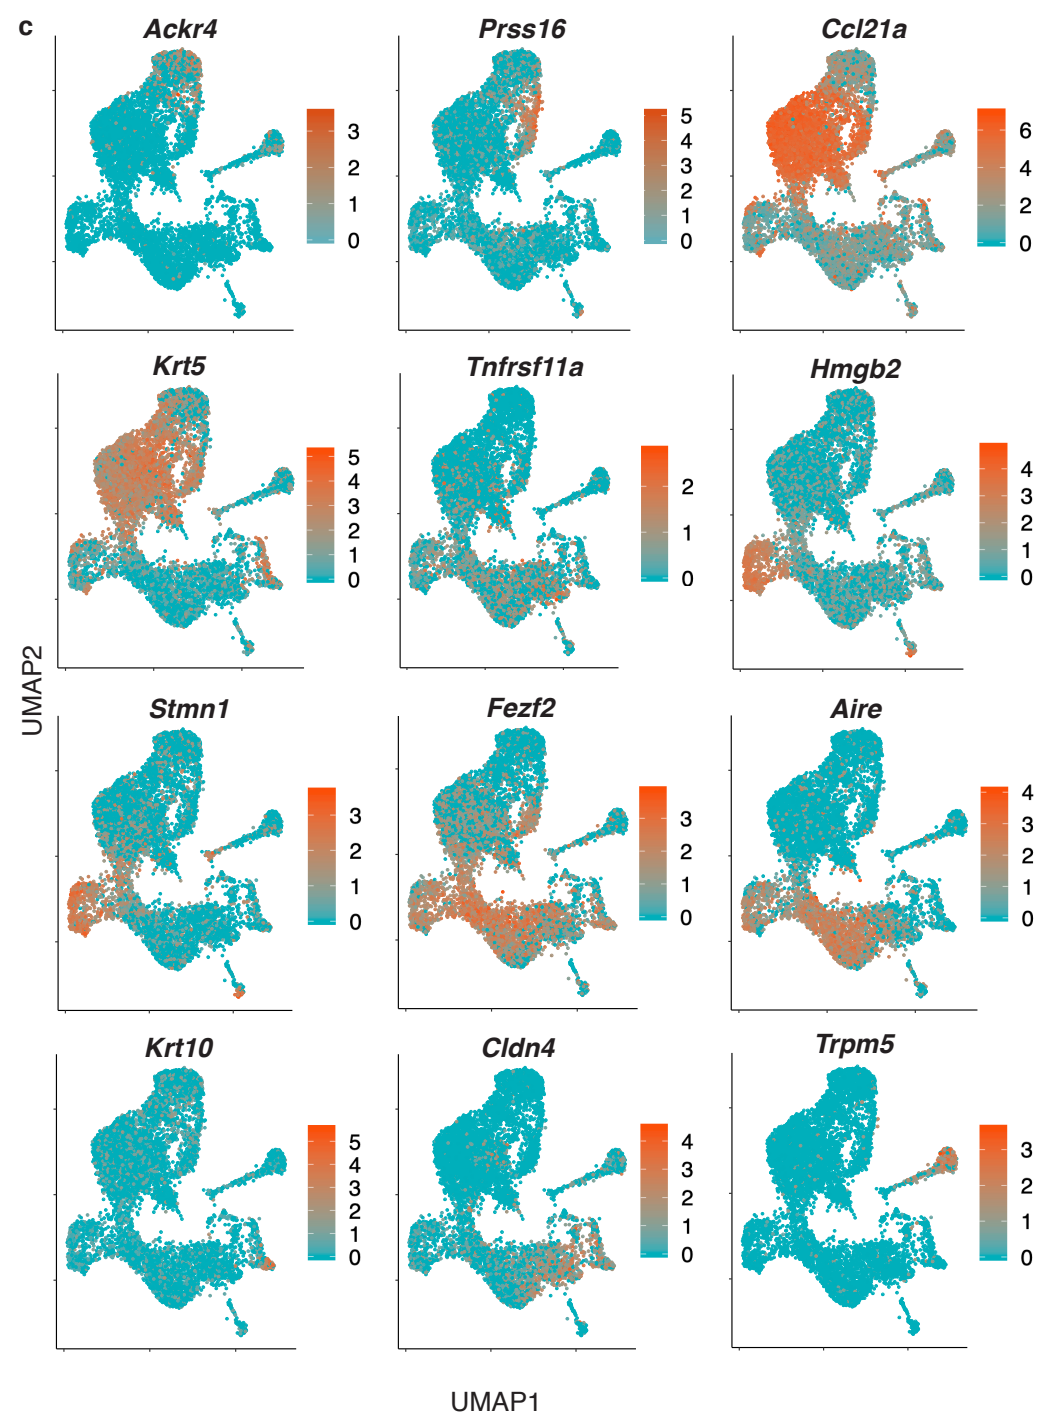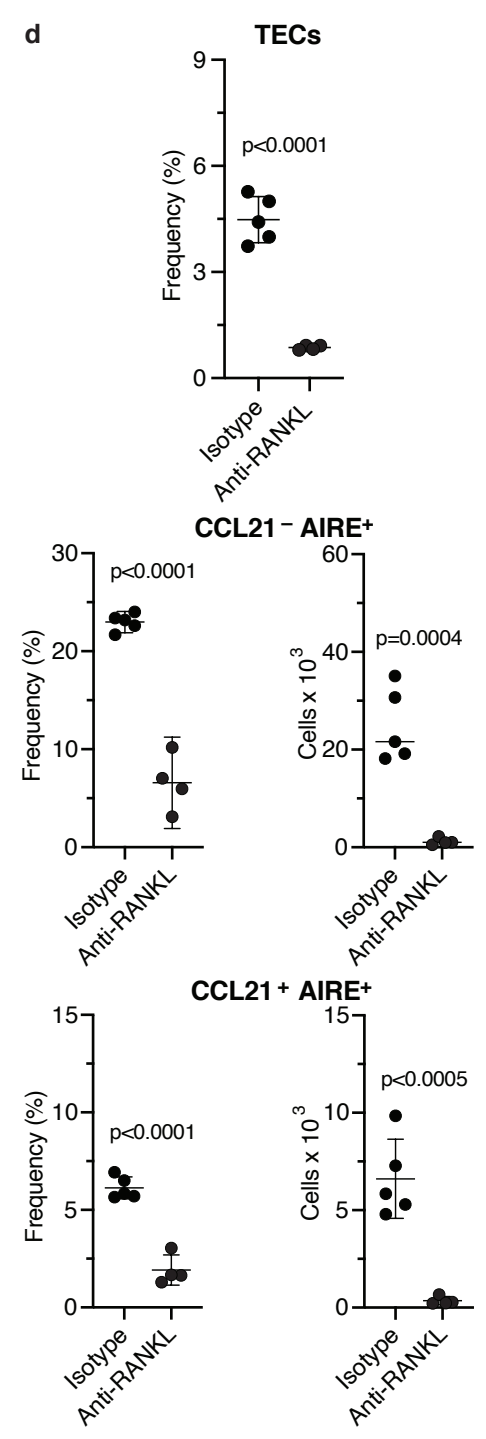

Supplement: supp [file elife-60188-supp-v1.zip › elife_poa_e60188_Figure_4_figure_supplement_1.pdf]

Ctrl wk 2

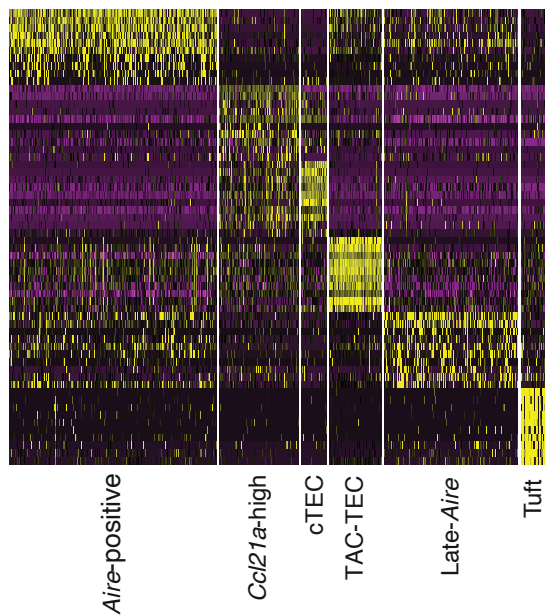

Wk 2

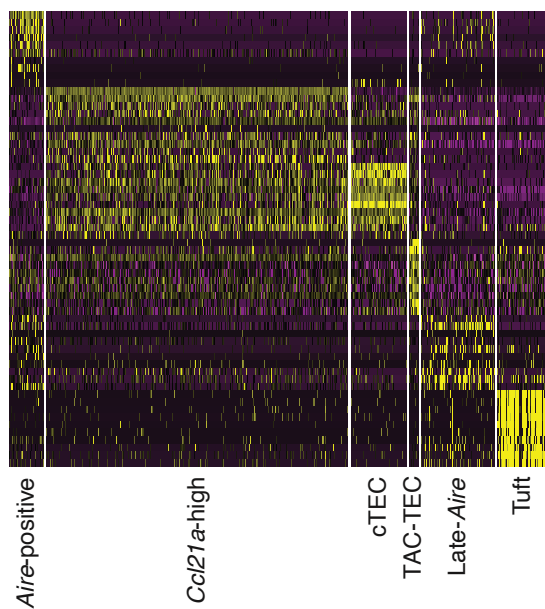

Wk 6

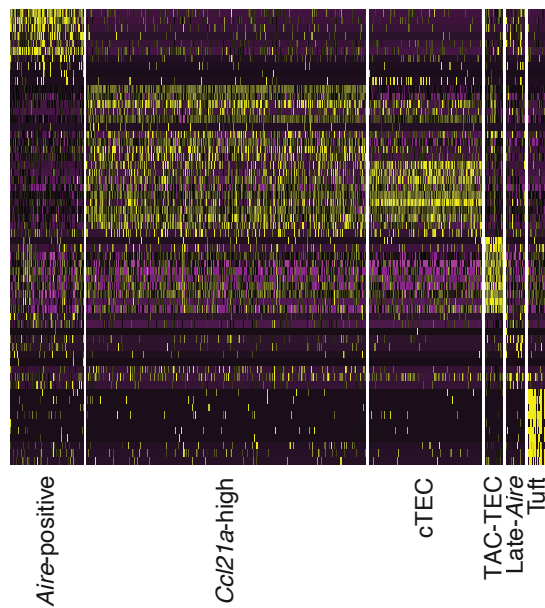

Ctrl wk 10

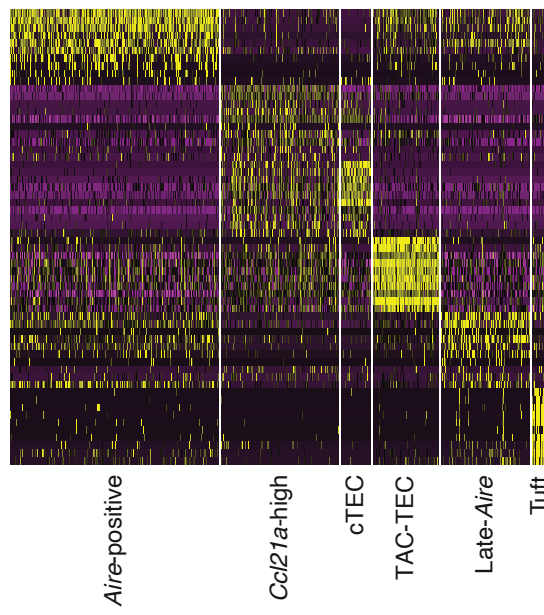

Wk 4

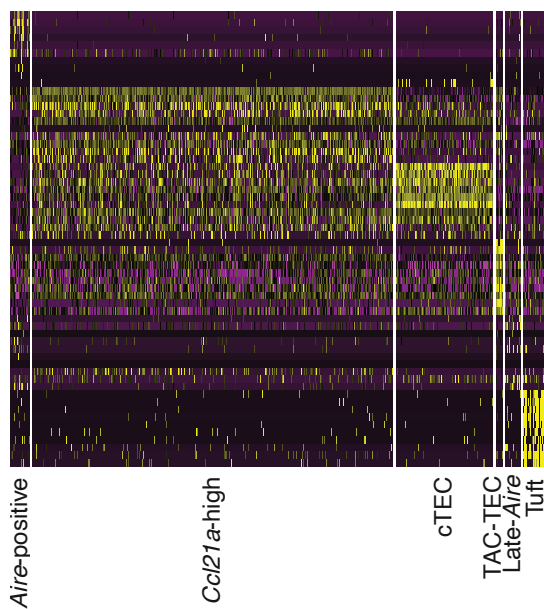

Wk 10

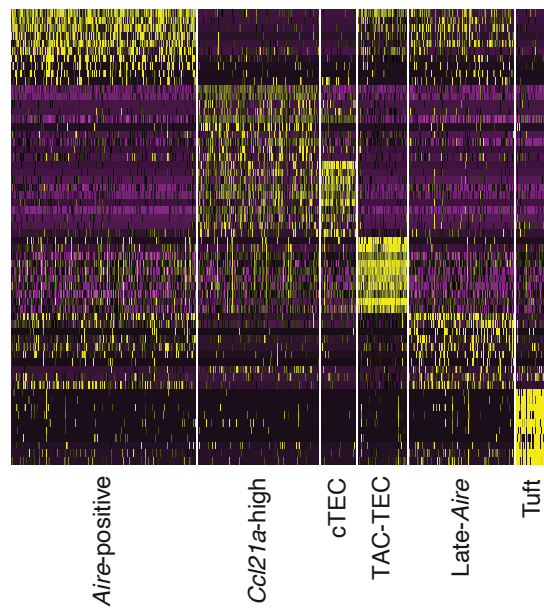

Supplement: supp [file elife-60188-supp-v1.zip › elife_poa_e60188_Figure_4_figure_supplement_3.pdf]

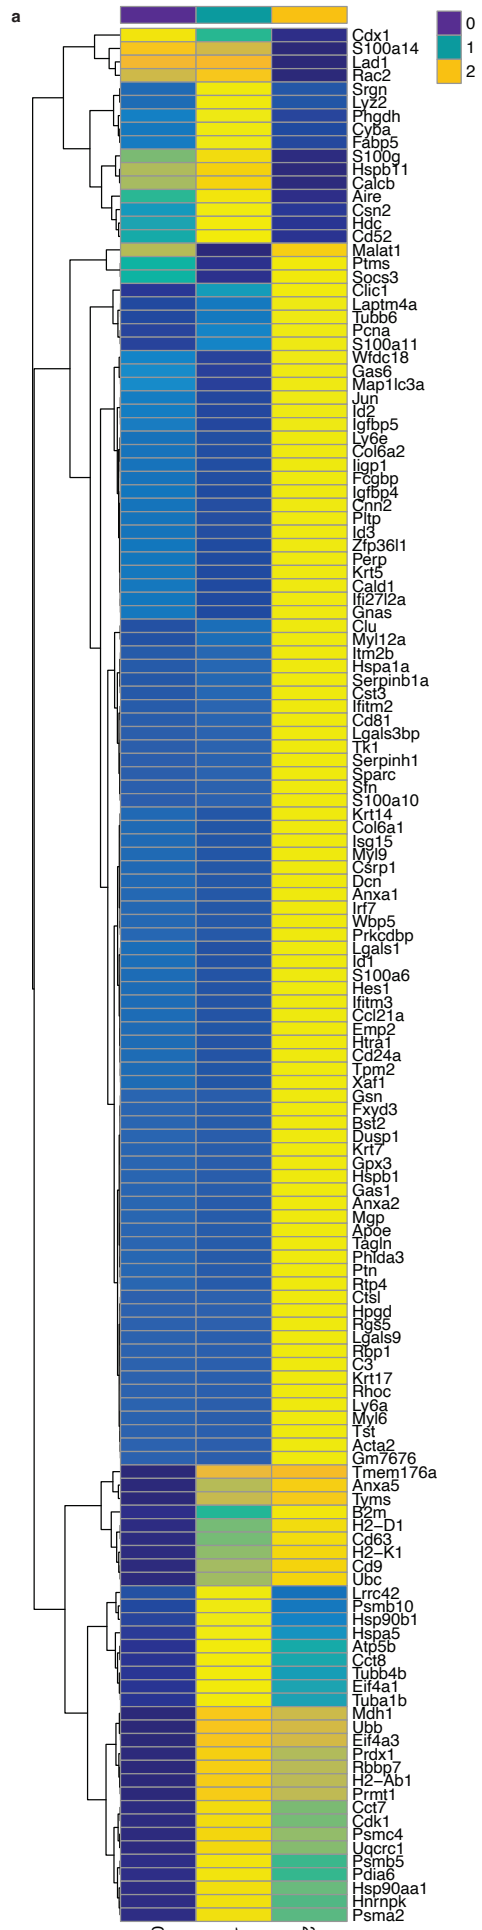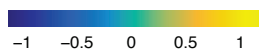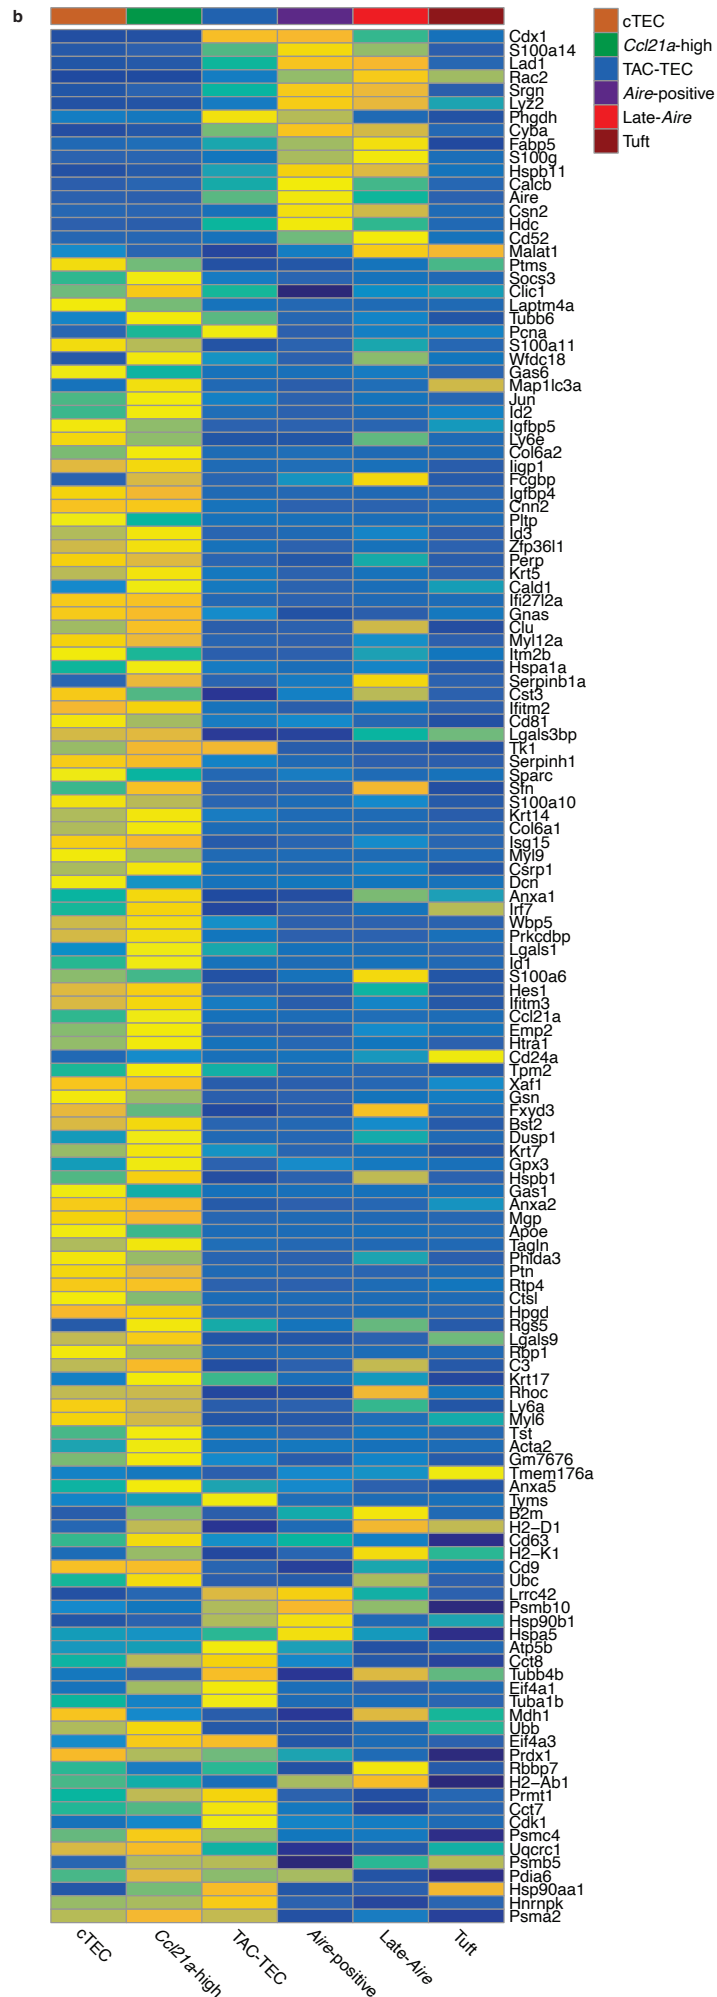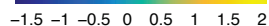

Supplement: supp [file elife-60188-supp-v1.zip › elife_poa_e60188_Figure_5_figure_supplement_2.pdf]

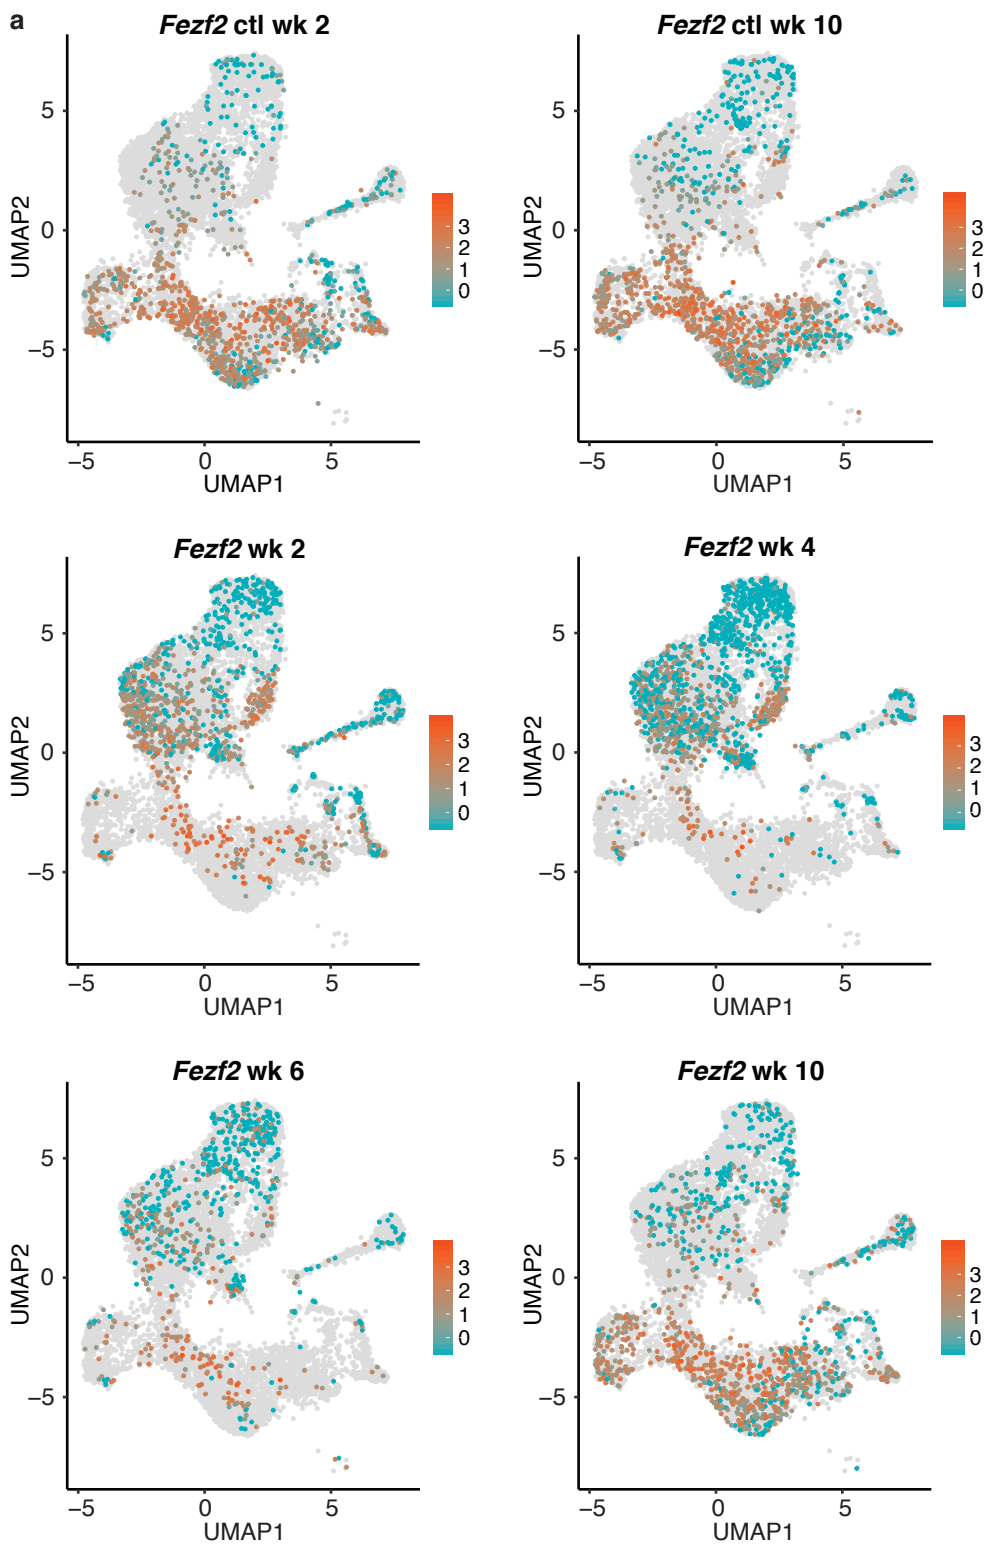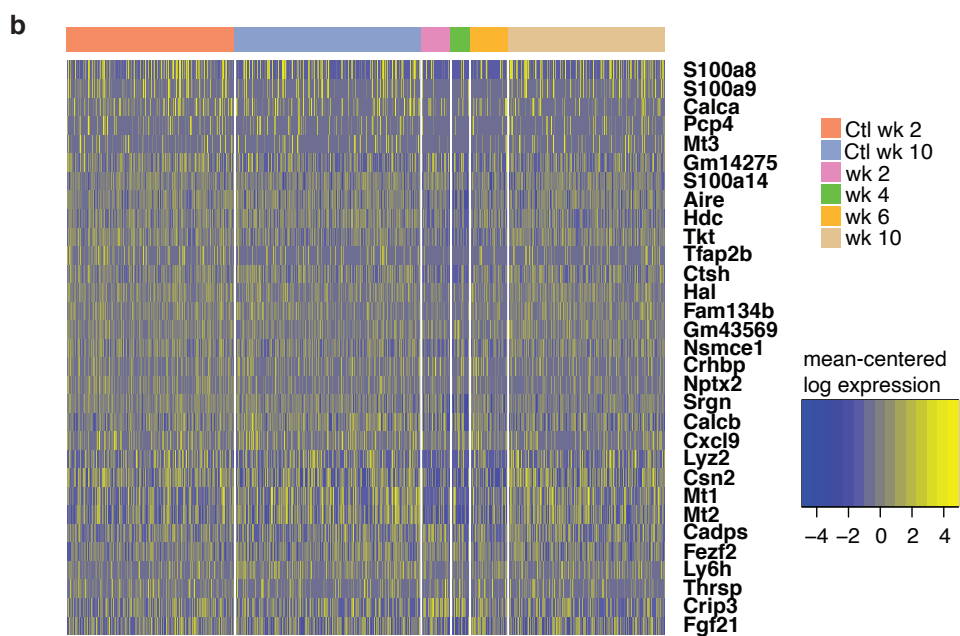

Supplement: supp [file elife-60188-supp-v1.zip › elife_poa_e60188_Figure_6_figure_supplement_1.pdf]

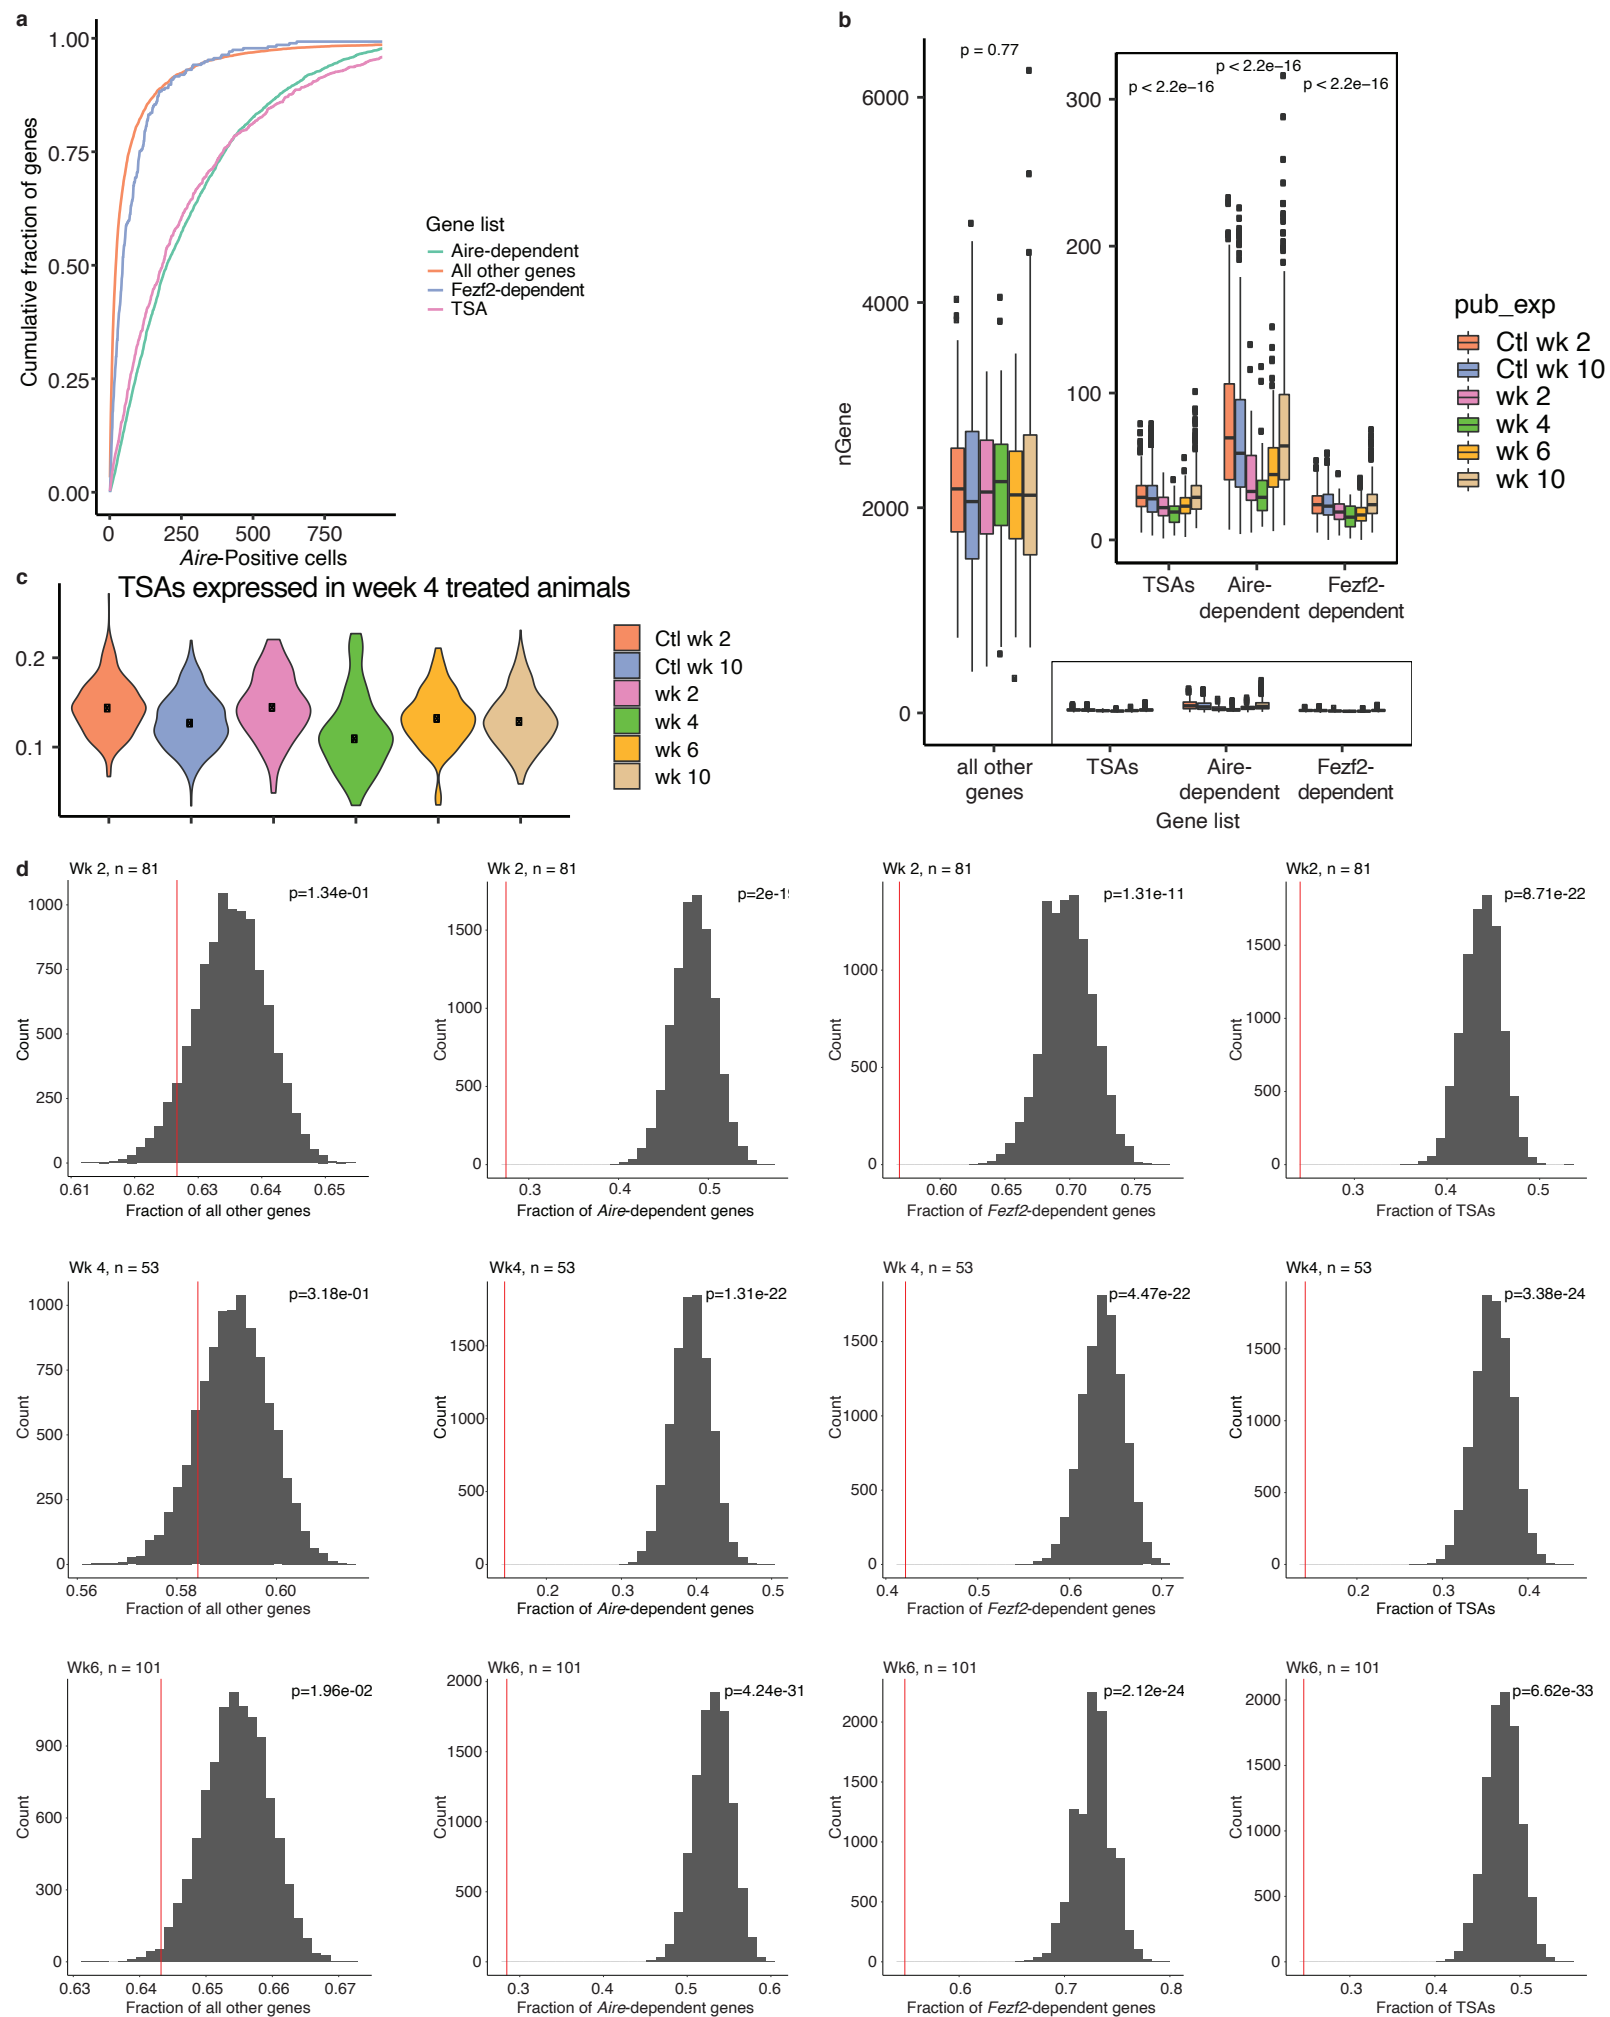

Supplement: supp [file elife-60188-supp-v1.zip › elife_poa_e60188_Figure_6_figure_supplement_3.pdf]
